1 **Rescue of aged muscle stem cell intrinsic quiescence defects by AKT inhibition**  
2 **revealed with a 3D biomimetic culture assay**

3  
4 **Authors**

5 Erik Jacques<sup>1,2</sup>, Yinni Kuang<sup>2,3</sup>, Allison P. Kann<sup>4,5,6</sup>, Robert S. Krauss<sup>4,5,6</sup>, and Penney M.  
6 Gilbert<sup>1,2,3\*</sup>

7  
8 **Affiliations**

9 <sup>1</sup> Institute of Biomedical Engineering, University of Toronto, Toronto, ON, M5S3G9, Canada

10 <sup>2</sup> Donnelly Centre, University of Toronto, Toronto, ON M5S3E1, Canada

11 <sup>3</sup> Department of Cell and Systems Biology, University of Toronto, Toronto, ON M5S3G5, Canada

12 <sup>4</sup> Department of Cell, Developmental, and Regenerative Biology, Icahn School of Medicine at  
13 Mount Sinai, New York, NY 10029, US

14 <sup>5</sup> Black Family Stem Cell Institute, Icahn School of Medicine at Mount Sinai, New York, NY  
15 10029, USA

16 <sup>6</sup> Graduate School of Biomedical Sciences, Icahn School of Medicine at Mount Sinai, New York,  
17 NY 10029, USA

18  
19 **\* Corresponding author:**

20 Penney M. Gilbert, PhD

21 Associate Professor

22 Department of Cell and Systems Biology

23 Donnelly Center for Cellular and Biomolecular Research

24 University of Toronto

25 160 College Street

26 Toronto, ON, M5S 3E1

27 Phone: +1 416-978-2501

28 Email: [penney.gilbert@utoronto.ca](mailto:penney.gilbert@utoronto.ca)

29

30

31

32 **Abstract**

33 Adult skeletal muscle harbors a population of muscle stem cells (MuSCs) that are required to repair  
34 or reform multinucleated myofibers after a tissue injury. In youth, a portion of MuSCs return to a  
35 reversible state of cell cycle arrest termed ‘quiescence’ after injury resolution. By contrast, a  
36 proportion of aged MuSCs exist in a semi-activated state under homeostatic conditions, and  
37 prematurely respond to subsequent injury cues, thereby failing to return the tissue to its pre-injury  
38 state. The heterogeneity of MuSC function is linked to quiescence depth, but regulation of the  
39 balance between MuSC quiescence and activation in youth and in age is incompletely understood.  
40 This is due in part to the paucity of scalable methods that support MuSC quiescence in culture,  
41 and in turn necessitates reliance on low-throughput *in vivo* studies. To fill this gap, we developed  
42 a simple, 96-well format method to inactivate MuSCs isolated from skeletal muscle tissue, and  
43 return them to a quiescent-like state for at least one-week by culturing them within a three-  
44 dimensional engineered sheet of myotubes. Seeding the myotube sheets with different numbers of  
45 MuSCs elicited population-level adaptation activities that converged on a common steady-state  
46 niche repopulation density. By evaluating MuSC engraftment over time in culture, we observed  
47 reversible cell cycle exit that required both myotubes and a 3D culture environment. Additional  
48 quiescence-associated hallmarks were identified including a Pax7<sup>+</sup>CalcR<sup>+</sup>MyoD<sup>-</sup>c-FOS<sup>-</sup> molecular  
49 signature, quiescent-like morphology including oval-shaped nuclei and long cytoplasmic  
50 projections with N-cadherin<sup>+</sup> tips, as well as the acquisition of polarized niche markers. We further  
51 demonstrate a relationship between morphology and cell fate signature using high-content imaging  
52 and CellProfiler<sup>TM</sup>-based image analysis pipelines. MuSC functional heterogeneity during  
53 engraftment was observed across all metrics tested, suggesting *in vivo*-like subpopulation activities  
54 are reflected in the assay. Notably, aged MuSCs introduced into young 3D myotube cultures  
55 displayed aberrant proliferative activities, delayed inactivation kinetics, and activation-associated  
56 morphologies that we show are rescued by wortmannin treatment. Thus, this miniaturized,  
57 biomimetic culture assay offers an unprecedented opportunity to uncover regulators of quiescence  
58 in youth and in age.

59  
60 **Key words:** Muscle stem cell, engineered skeletal muscle, inactivation, quiescence, aging

61

62

63

64

65

66

67

68

## 69 **Introduction**

70 Muscle stem cells (MuSCs) are an adult stem cell population identifiable by the selective  
71 expression of the paired-box transcription factor Pax7 in skeletal muscle tissue, and are essential  
72 to muscle development and regeneration.<sup>1-5</sup> At rest, MuSCs exist in a reversible state of quiescence  
73 characterized, among others, by the absence of cell cycle indicators<sup>6,7</sup> lowered metabolic activity<sup>8</sup>,  
74 RNA content<sup>9</sup>, increased expression of genes such as CalcR, CD34, Spry 1, and Sdc4<sup>9-11</sup>, and an  
75 elaborate morphology<sup>12</sup>. Anatomically, they reside between a myofiber and the surrounding basal  
76 lamina, a highly specialized microenvironment or “niche”, that conveys unto them the popularized  
77 term ‘satellite cell’.<sup>13</sup> Though quiescent, they are not dormant but are in fact idling; constantly  
78 communicating with their niche and waiting to respond to stressors.<sup>14,15</sup> Examples include  
79 significant physical activity causing mechanically induced damage, trauma, or exposure to  
80 myotoxic compounds that induce myofiber degradation.<sup>16,17</sup> In these situations, MuSCs rapidly  
81 shift to an activated state wherein they enter cell cycle, and proliferate to produce progeny that  
82 differentiate to repair or create new myofibers, or they undertake self-renewing divisions where a  
83 subpopulation eventually return to quiescence and repopulate the niche.<sup>18</sup>

84 Quiescence is essential to ensure the long-term stability of the MuSC pool and activation  
85 is necessary to ensure the repair process.<sup>19</sup> However, how the quiescence state and the process of  
86 MuSC inactivation is regulated remains largely unexplored. MuSCs are increasingly regarded as  
87 existing individually along a quiescence-activation spectrum where shifts occur during different  
88 stages of regeneration.<sup>19</sup> Indeed, the depth of quiescence shows to be positively correlated with  
89 stem cell potency, or ‘stemness’, which also remains unexplained. Consequently, instances where  
90 depth of quiescence is lost, such as in aging, leads to less efficient and incomplete regeneration,  
91 and a progressive decline in MuSC number.<sup>20</sup>

92 Tissue dissection, enzymatic digestion and cell sorting imparts an injury-associated stress  
93 response to MuSCs, and causing isolation-induced activation.<sup>21</sup> Therefore, studies of quiescence  
94 *in vitro* must override activation to reinstate a quiescent state. Indeed, several studies describe *in*  
95 *vitro* treatments to delay activation for days (at most) through manipulation of the substrate or  
96 culture media.<sup>22-24</sup> Though temporary, these strategies offer a window of opportunity to study  
97 quiescence regulation, while also offering ways to augment MuSC cell-centered therapies by  
98 improving regenerative potency by conferring a quiescent state to the population.<sup>9,22-24</sup> Combining  
99 a chemically defined ‘quiescence media’ with engineered muscle fibers was reported to maintain  
100 MuSCs in culture with limited proliferative activity or changes to cell volume, and sustained CD34  
101 expression for a 3.5-day period.<sup>11</sup> More recently, three-dimensional (3D) skeletal muscle  
102 macrotissue platforms were shown to support Pax7<sup>+</sup> reserve cells<sup>25,26</sup> within human myoblast  
103 populations to take on a reversible quiescent-like state.<sup>27-32</sup> To date, a strategy to inactivate freshly  
104 isolated MuSCs in culture for >3.5 days, while supporting molecular and morphological hallmarks  
105 of quiescence has yet to be reported.

106 We previously reported a method to study skeletal muscle endogenous repair “in a dish”  
107 in a 24-well format by introducing MuSCs into thin sheets of engineered muscle tissue that we  
108 then injured using myotoxins.<sup>33</sup> In our uninjured control tissues, we observed a non-negligible  
109 proportion of the engrafted cells remained mononucleated at the assay endpoint, in spite of the  
110 differentiation-inducing culture media used. From this, we hypothesized that the muscle tissues  
111 were providing a pro-quiescence niche. To test this, we produced miniaturized (96-well format)  
112 muscle tissues, derived from primary mouse myoblasts, into which we introduced freshly sorted  
113 mouse MuSCs. We report that within these biomimetic niches, the MuSCs rapidly inactivated for  
114 at least 7 days. Analysis of MuSC activities reflected functional heterogeneity and population level  
115 adaptations to achieve a steady-state stem cell pool size. MuSC interactions with the 3D engineered  
116 myotube niche were sufficient for inducing *in vivo*-like hallmarks of quiescence never before  
117 reported *in vitro*, including elongated nuclei and elaborated cytoplasmic projections.<sup>12</sup> Integrating  
118 the culture assay with a high content imaging system and CellProfiler<sup>TM</sup>-based image analysis  
119 pipelines allowed us to relate cell fate signatures to morphometric features and produced criteria  
120 to identify quiescent MuSCs based solely on morphology. Further, aged MuSCs introduced into  
121 the assay displayed phenotypic and functional defects that were rescued by wortmannin, a  
122 treatment shown by others to push activated young MuSCs into a deep quiescent state. Thus, we  
123 present a new MuSC quiescence assay that recapitulates hallmarks of young and aged homeostatic  
124 muscle “in a dish” for the first time, which enabled the identification of a previously unreported  
125 strategy to correct aged MuSC dysfunction.

126

## 127 **Results**

### 128 **Engineered myotube templates derived from primary mouse myoblasts maintain integrity** 129 **for 2-weeks in culture**

130 We first set out to engineer a skeletal muscle microenvironment suited to investigate the ability of  
131 a 3D myotube niche to induce a quiescent-like phenotype upon freshly isolated (i.e. activated)  
132 MuSCs cultured *in vitro*. We previously reported a method to prepare thin sheets of human  
133 myotubes situated within a 24-well format, together with a strategy to evaluate mouse MuSC  
134 endogenous repair ‘in a dish’.<sup>33</sup> Herein we adapted and extended the method to create thin sheets  
135 of murine myotubes that fit within a 96-well plate footprint. Briefly, we incorporated primary  
136 mouse myoblasts within a mixture of media, fibrinogen, and Geltrex<sup>TM</sup> (i.e. reconstituted basement  
137 membrane proteins). The resultant slurry was pipetted into pieces of thin, porous cellulose teabag  
138 paper, pre-adsorbed with thrombin, and situated within a 96-well plate (**Figure 1A**). In this way,  
139 fibrin hydrogel gelation is delayed until the cell/fibrinogen slurry diffuses within the thrombin-  
140 containing cellulose scaffold. Following a two-day equilibration period in growth media (GM),  
141 the tissues were transitioned to a low-mitogen differentiation media (DM) to support multinucleate  
142 myotube formation within the cellulose reinforced fibrin hydrogel (**Figure 1A-C**).

143

144 Spontaneous twitch contractions were first observed on day 4 (data not shown). Peak  
145 myotube content ( $\approx 65\%$  by sarcomeric  $\alpha$ -actinin (SAA) tissue coverage) and a nuclear fusion index  
146 of 90% was achieved by 5 days in DM with as few as 25,000 cells per tissue (**Figure 1B-D,**  
147 **Supplementary Figure 1**). Since myotube degradation could serve as an activation cue for the  
148 engrafted MuSCs, we evaluated the integrity of the tissues over time in culture. Starting on day  
149 18, a visual inspection of tissues revealed loss of myotubes around the periphery of the tissues and  
150 quantification of SAA coverage showed a corresponding drop (**Figure 1B,D**). A colorimetric  
151 metabolic activity assay (i.e., MTS) revealed that mitochondrial activity was significantly reduced  
152 on day 18 when compared to day 10 (**Figure 1E**), another indication that the integrity of the tissues  
153 becomes compromised at these time-points. Based on these analyses, we established conditions to  
154 engineer a mouse myotube template and concluded that day 5 to  $<$  day 18 of myotube template  
155 culture would serve as the assay window.

156

### 157 **MuSC populations persist in myotube templates**

158 The engineered mouse myotube template incorporates key cellular, biochemical and biophysical  
159 aspects of the MuSC niche: myofibers and extracellular matrix (ECM).<sup>13,34,35</sup> Thus, we next sought  
160 to determine whether adult mouse MuSCs could persist, in terms of pool size and Pax7 expression,  
161 when introduced to these biomimetic cultures. Firstly, we adapted a magnetic-activated cell sorting  
162 (MACS) protocol as a convenient and fast alternative to fluorescence-activated cell-sorting  
163 (FACS) for enriching the Pax7<sup>+</sup> mononucleated cell population from digested skeletal muscle. By  
164 conducting 2 rounds of microbead based lineage depletion followed by integrin  $\alpha$ -7 enrichment,  
165 we achieved an average purity of 93% Pax7<sup>+</sup> cells (**Supplementary Figure 2**), which meets FACS  
166 purity values reported by others.<sup>36,37</sup> Using this protocol, Pax7<sup>+</sup> MuSCs were enriched from the  
167 enzymatically dissociated hindlimb muscles of 129-Tg(CAG-EYFP)7AC5Nagy/J transgenic  
168 mice.<sup>38</sup> Freshly sorted MuSCs were seeded onto day 5 myotube templates, and the tissue co-  
169 cultures processed for analysis at 1, 3, and 7 days post-engraftment (DPE) (**Figure 2A**). Over the  
170 one-week culture period, the Pax7<sup>+</sup> mononuclear donor (YFP<sup>+</sup>) cells were seen distributed  
171 throughout the myotube template and adopting an elongated morphology that aligned with the  
172 local myotubes (**Figure 2B-C**). We investigated the effect of introducing different numbers of  
173 MuSCs onto individual myotube templates, by quantifying the population of Pax7<sup>+</sup> mononuclear  
174 donor cells over time. Seeding 500 MuSCs resulted in a relatively stable pool size over time.  
175 Interestingly, when a higher (1500 or 2500) or lower number of MuSCs were introduced to  
176 myotube templates, over time the number of Pax7<sup>+</sup> donor cells converged to match the pool size  
177 attained in the 500 MuSC condition (**Figure 2D**). Collectively, these data indicate that the  
178 engrafted MuSC population persists and establishes a steady-state cell density within the  
179 engineered niche.

180

### 181 **MuSCs reversibly inactivate within myotubes templates**

182 We next studied the behavior and fate of freshly isolated MuSCs engrafted within myotube  
183 templates and determined that they inactivate over a 7-day culture period, and can be coaxed to

184 reactivate by injury stimuli. We began by evaluating MuSCs within the engraftment condition that  
185 lent to a stable population density over time (i.e. 500 MuSCs per tissue). Calcitonin receptor  
186 (CalcR) expression is a hallmark of quiescent MuSCs.<sup>39–42</sup> Indeed, at the protein level, CalcR is  
187 expressed by quiescent MuSCs, but is then absent from all MuSCs within 48-hours of an *in vivo*  
188 myotoxin injury or within 48-hours of prospective isolation followed by *in vitro* culture.<sup>39,40,42</sup> In  
189 the context of our 3D culture assay, the majority of MuSCs expressed CalcR at 1 DPE, with a  
190 sharp decline in the proportion of CalcR<sup>+</sup> donor cells observed at 3 DPE (**Supplementary Figure**  
191 **3**). Interestingly, ~15% of donor MuSCs were CalcR<sup>+</sup> at both 3 and 7 DPE (**Supplementary**  
192 **Figure 3**). Given the lack of evidence for CalcR<sup>+</sup> MuSCs in prolonged *in vitro* cultures, we posited  
193 that this sub-population might be reflective of MuSCs that had resisted activation in favour of  
194 maintaining a more quiescent-like state, which we sought to interrogate further.

195 After a single day of culture, we found that ~75% of the donor MuSCs (YFP<sup>+</sup>Caveolin-1<sup>+</sup>  
196 cells) engrafted within the myotube templates expressed the transcription factor c-FOS, among the  
197 earliest transcriptional events reported to-date in the MuSC activation sequence.<sup>9,43–45</sup> The  
198 existence of c-FOS<sup>+</sup> donor cells at this time-point is consistent with the notion of an activation  
199 refractory sub-population. By 3 DPE, the proportion of caveolin-1<sup>+</sup>c-FOS<sup>+</sup> mononuclear cells  
200 dropped to ~30%, with similar proportions observed on 7 DPE (**Figure 3A-B**). The maintenance  
201 of a steady-state population of donor MuSCs from 1 DPE to 3 DPE, coupled with the rapid loss of  
202 c-FOS immunolabeling by 3 DPE, suggests that myotube template culture induces MuSCs to  
203 inactivate.

204 Consistently, when we quantified the incidence of MuSCs in the active phase of the cell  
205 cycle via Ki67 labelling, we found that at 3 DPE, only ~1/3 of the Pax7<sup>+</sup> mononuclear donor cell  
206 population was Ki67<sup>+</sup>, and this dropped to ~10% by 7 DPE (**Figure 3C**). To better resolve the  
207 proliferative trajectory of the engrafting MuSCs, we conducted a Ki67 co-labelling study whereby  
208 5-ethynyl-2'-deoxyuridine (EdU) was refreshed in the culture media daily over the 1-week culture  
209 period (**Figure 3D**). Of the Ki67<sup>+</sup> mononuclear donor cells present at 7 DPE, the vast majority  
210 were EdU<sup>-</sup> (**Figure 3E**). ~30% were EdU<sup>+</sup>, indicating cell cycle entry at some point during the  
211 one-week culture period, and a cessation by 7 DPE (**Figure 3E**). This correlates well with the  
212 proportion of Ki67<sup>+</sup> MuSCs we observed at 3 DPE (**Figure 3B**). This data, together with a scarcity  
213 of EdU<sup>+</sup> myonuclei observed in the cultures (data not shown), suggests that the main fate of the  
214 EdU labeled MuSCs is eventual cell-cycle exit, and not myotube fusion.

215 Lastly, we sought to understand whether the inactivated donor cells at 7 DPE were capable  
216 of re-entering the cell-cycle. We first established a barium chloride exposure protocol that induced  
217 effective clearing of the myotubes with a non-significant change to MuSC population density  
218 (**Figure 3F** and **Supplementary Figure 4**). We then analyzed the mononuclear YFP<sup>+</sup>Pax7<sup>+</sup>  
219 population 2 days post-injury and observed a statistically significant increase in the proportion of  
220 Ki67<sup>+</sup> cells as compared to the control condition (**Figure 3G**). Thus, myotube template cultures  
221 allow for inactivation and cell-cycle exit of engrafted MuSCs, which can be reversed with the  
222 injury-associated stimuli provided by barium chloride exposure.

## 223 **Engrafted MuSCs adapt their pool size to a myotube template threshold**

224 Regardless of the initial size of the MuSC pool, a common mononuclear YFP<sup>+</sup>Pax7<sup>+</sup> cell density  
225 was attained by 7 DPE (**Figure 2D**). To uncover cellular mechanisms underlying the acquisition  
226 of a MuSC steady-state population density, we investigated how the donor MuSC pool responded  
227 under a set of distinct starting conditions. We began by extending the EdU/Ki67 co-labelling study  
228 (**Figure 3D-E**) to include an evaluation of conditions where more (1500, 2500) or less (200)  
229 MuSCs were seeded onto the myotube templates. Compared with the 500 MuSC seeding  
230 condition, we found a significant increase in the proportion of mononuclear YFP<sup>+</sup>Ki67<sup>-</sup> cells that  
231 were EdU<sup>+</sup> at 7 DPE in cultures seeded with 200 MuSCs, suggesting the MuSC pool expanded to  
232 attain a steady-state density (**Supplementary Figure 5A,C**). By contrast, in conditions where  
233 >500 MuSCs were seeded, a significant decrease in the proportion of mononuclear YFP<sup>+</sup>Ki67<sup>-</sup>  
234 cells that were EdU<sup>+</sup> at 7 DPE was observed (**Supplementary Figure 5C**). In these conditions, a  
235 decrease in the MuSC pool size by 7 DPE could be achieved through cell death or by fusion into  
236 myotubes. Consistent with the latter hypothesis, upon visual inspection we saw a qualitatively  
237 greater number of donor derived myotubes in the cultures seeded with >500 MuSCs  
238 (**Supplementary Figure 5B**), which was confirmed by quantifying the percentage area of myotube  
239 templates covered by YFP signal (**Supplementary Figure 5D**). In sum, we conclude that MuSCs  
240 meet a steady-state population density via increased proliferation when beginning below the 500-  
241 cell threshold, and with increased cell fusion when beginning above it.

242

## 243 **A three-dimensional myotube culture is required for a persistent MuSC population *in vitro***

244 The rapid inactivation and subsequent maintenance of Pax7<sup>+</sup> MuSCs engrafted within the 3D  
245 myotube templates (**Figures 2-3**) represents a divergent phenotype when compared to  
246 conventional 2D culture (**Figure 4A-B**).<sup>46</sup> Therefore, we next sought to elucidate culture design  
247 criteria that served to support MuSC inactivation and pool maintenance over time. We first  
248 explored the response of MuSCs seeded onto tissues on Day 0 of myotube template differentiation,  
249 a time-point corresponding to the earliest myocyte fusion events, and therefore when myotubes  
250 were absent from the tissues. Compared to MuSCs seeded on myotube templates on Day 5 of  
251 differentiation, Day 0 seeding resulted in a progressive loss of YFP<sup>+</sup>Pax7<sup>+</sup> mononuclear cells, and  
252 most of those that remained were Ki67<sup>+</sup> (**Figure 4C-D**). The striking contrast in YFP<sup>+</sup> myotube  
253 content observed at 7 DPE upon comparing these two conditions suggests that the MuSCs  
254 engrafted on Day 0 had undergone differentiation (**Supplementary Figure 6**). We next determined  
255 whether a 3D cellulose-reinforced hydrogel alone was sufficient to support MuSC inactivation and  
256 maintenance, since the myocytes present on Day 0 of differentiation may have exerted a dominant  
257 effect overriding contributions of the 3D culture environment. However, this notion was  
258 abandoned upon finding that the outcome of this culture scenario (**Figure 4E**) very closely  
259 matched what we observed when the MuSCs were cultured in 2D Geltrex-coated culture wells  
260 (**Figure 4B**); a loss of the YFP<sup>+</sup>Pax7<sup>+</sup> mononuclear population over time. Our results instead  
261 seemed to suggest that the myotube template played a central role in inactivating and maintaining  
262 a persistent population of MuSCs in culture. Indeed, upon adding MuSCs to a Day 5 monolayer

263 of myotubes in 2D culture, a Pax7<sup>+</sup> population was maintained over the one-week culture period  
264 (**Figure 4F**). However, in striking contrast to the 3D myotube template culture (**Figure 4C**), only  
265 a minority of the Pax7<sup>+</sup> donor cells were Ki67<sup>-</sup> at 7 DPE (**Figure 4F**). From this iterative analysis,  
266 we conclude that myotubes are necessary for Pax7<sup>+</sup> MuSC persistence, and that the combination  
267 of myotubes and a three-dimensional culture environment drives the MuSC inactivation process.

268

### 269 **Engrafted MuSCs adopt quiescent-like morphologies that predict cell fate signature**

270 Qualitatively, the engrafted MuSCs in our cultures adopted an elongated morphology over time  
271 (**Figure 2B-C, Figure 3A, Figure 5A**), reminiscent of quiescent MuSCs *in vivo*, and contrasting  
272 against with morphologies observed in 2D cultures (**Supplementary Figure 7**).<sup>12,47,48</sup> Therefore,  
273 we next overcame a significant data analysis bottleneck by establishing and validating a  
274 CellProfiler<sup>TM</sup>-based image analysis pipeline in order to segment and evaluate donor MuSCs in  
275 our phenotypic datasets (see Methods and **Supplementary Figure 8**).<sup>49</sup> The cytoplasmic  
276 elongation of mononucleated Pax7<sup>+</sup> donor cell bodies was captured by applying a ratio of max/min  
277 feret diameter to segmented images of tissues immunostained for YFP, Pax7, and DAPI. The  
278 roundness of nuclei within mononucleated YFP<sup>+</sup>Pax7<sup>+</sup> cells was evaluated using the measurement  
279 of eccentricity, whereby a value of 0 corresponds to a perfect circle, and a value of 1 to a straight  
280 line (**Figure 5B**). With this pipeline, we determined that the Pax7<sup>+</sup> donor cell population  
281 progressively shifted from low max/min feret diameter ratios and eccentricities (lower left  
282 quadrant) to high max/min feret diameter ratios and eccentricities (upper right quadrant) over time  
283 in 3D myotube culture (**Figure 5C**). The rice-like nuclear morphology and elaborated cytoplasmic  
284 projections of the Pax7<sup>+</sup> donor cells at 7 DPE resembled quiescent features of MuSCs *in vivo* that  
285 were shown to be induced and maintained by tipping the Rho family GTPase balance to favour  
286 cytoskeletal remodelling events caused by Rac signaling.<sup>48</sup>

287 We next sought to determine whether the donor MuSC morphologies observed in our  
288 cultures corroborated with the activation status of the cells. We introduced immunolabelling for  
289 MyoD, which, together with Pax7 staining, delivered molecular signatures for activated  
290 (Pax7<sup>+</sup>MyoD<sup>+</sup>) and inactivated (Pax7<sup>+</sup>MyoD<sup>-</sup>) donor cell populations. As expected, the ratio of  
291 Pax7<sup>+</sup>MyoD<sup>+</sup> to Pax7<sup>+</sup>MyoD<sup>-</sup> donor cells over time followed a trend similar to Ki67 status (**Figure**  
292 **3C**), with a transient increase in Pax7<sup>+</sup>MyoD<sup>+</sup> cells at 3 DPE and a predominance of Pax7<sup>+</sup>MyoD<sup>-</sup>  
293 cells at 7 DPE (**Supplementary Figure 9A-B**). By evaluating the mean max/min feret diameter  
294 ratio and mean eccentricity values of the Pax7<sup>+</sup>MyoD<sup>+</sup> and Pax7<sup>+</sup>MyoD<sup>-</sup> cell populations, we  
295 found that nuclear eccentricity differs between the populations by 3 DPE, while population  
296 divergence according to max/min feret diameter ratio (>2-fold) emerged a bit later, at 7 DPE  
297 (**Supplementary Figure 9C**). Specifically, nuclear morphology of the Pax7<sup>+</sup>MyoD<sup>-</sup> population  
298 showed a progressive, statistically significant transition to a rice-like shape, while Pax7<sup>+</sup>MyoD<sup>+</sup>  
299 nuclei remained more rounded. Elongation of the cell body and elaborate projections were features  
300 that exclusively characterized the Pax7<sup>+</sup>MyoD<sup>-</sup> cell population, and emerged between 3 DPE and  
301 7 DPE. Indeed, donor cells with a max/min feret diameter  $\geq 5.8$  uniformly displayed the  
302 Pax7<sup>+</sup>MyoD<sup>-</sup> signature of inactivated cells (**Supplementary Figure 9A**). Taken together,



303 morphological analysis of the engrafted MuSCs suggests that changes in nuclear morphology  
304 precede cell body extension and establishment of quiescent-like projections during the inactivation  
305 process, and that morphometric features alone may predict MuSC inactivation status.

306

### 307 **Engrafted MuSCs establish a polarized niche**

308 We next evaluated additional hallmarks of quiescent MuSCs including the spatial organization of  
309 cadherins, integrins, and extracellular matrix proteins relative to their niche.<sup>50-52</sup> *In vivo*, MuSCs  
310 are identified anatomically by their positioning sandwiched between a myofiber and the  
311 surrounding basal lamina.<sup>13</sup> This polarized niche lends to the intracellular segregation or deposition  
312 of proteins within MuSCs to the apical side facing the myofiber (e.g. N-cadherin) or to the basal  
313 side facing the basal lamina (e.g. integrin  $\alpha$ -7, laminin).<sup>51,52</sup> By evaluating immunolabelled tissues  
314 at 7 DPE we found that most mononucleated donor cells had an elongated morphology and were  
315 closely associated with multinucleated myotubes. In more than two-thirds of donor cells, M-  
316 cadherin expression restricted to the apical interface was observed (**Supplemental Figure 10**).

317 It was recently discovered that quiescent MuSCs localize the N-cadherin adhesion  
318 molecule to the tips of elaborated cytoplasmic projections (coined ‘quiescent projections’)<sup>48</sup>, a  
319 feature we also observed within our culture assay at 7 DPE (**Figure 6A**). While examples such as  
320 these were relatively uncommon occurrences, in each case the Pax7<sup>+</sup> donor cell morphology was  
321 characterized by a long oval-shaped nucleus and very long, elaborated cytoplasmic projections.  
322 Furthermore, we identified examples of polarized distribution of M-cadherin and integrin  $\alpha$ -7 or  
323 laminin  $\alpha$ -2 in Pax7<sup>+</sup> donor cells (**Figure 6B** and **Supplementary Figure 11**). This evidence  
324 demonstrates that the engrafted MuSCs can recapitulate anatomical hallmarks of MuSCs residing  
325 within adult homeostatic skeletal muscle, and suggests that acquisition of these features is  
326 dependent on interactions with MuSCs and their immediate myofiber niche.

327

### 328 **Aged MuSCs exhibit quiescence-related defects that can be rescued by Akt inhibition**

329 We have shown that freshly isolated MuSCs are coaxed into a quiescent-like state that is  
330 characterized by cell cycle exit, a Pax7<sup>+</sup>MyoD<sup>-</sup>c-Fos<sup>-</sup> signature, morphological and niche  
331 associated features, when introduced to a 3D myotube culture environment. A hallmark of MuSCs  
332 residing within aged muscle is precocious activation, owing to an improper maintenance and/or  
333 return to a quiescent state.<sup>20,53-56</sup> Indeed, a proportion of aged MuSCs remain ‘primed’ to activate.  
334 As a result of the improper repair kinetics caused by the ‘primed’ state, these MuSCs fail to meet  
335 regenerative demand and are eventually depleted with further age.<sup>20,57</sup> We next leveraged our assay  
336 to evaluate possible intrinsic defects in aged MuSC quiescence that might be apparent when they  
337 are decoupled from an aged niche environment. Upon seeding 500 MuSCs isolated from aged  
338 muscle onto a young 3D myotube template, we quantified a  $\approx$ 2-fold increase in Pax7<sup>+</sup>  
339 mononucleated donor cell density by 3 DPE relative to tissues engrafted by young MuSCs and  
340 analyzed at the same time-point (**Figure 7A** and **Supplementary Figure 12A**). Consistently, a  
341 greater proportion of aged as compared to young MuSCs were Ki67<sup>+</sup> at 3 DPE, and aged MuSC  
342 morphology at this time-point diverged significantly from that observed of young MuSCs in 3D

343 myotube cultures (**Figure 7B-C** and **Figure 2B**). By 7 DPE, aged MuSC engrafted cultures  
344 showed a small, but significant, decrease in population density compared to young MuSC  
345 engrafted tissues (**Figure 7A**). This, coupled with the trending increase in donor cell GFP<sup>+</sup> signal  
346 covering tissues at this timepoint (**Supplementary Figure 13**), suggested that the aged MuSCs  
347 were unable to maintain pool size and that the production of Pax7<sup>+</sup> donor cells observed at 3 DPE  
348 culminated in differentiation to myotubes. Nonetheless, the mononucleated aged Pax7<sup>+</sup> donor cell  
349 population that persisted throughout the culture period showed a decline in the proportion of c-  
350 FOS<sup>+</sup> (**Figure 7D**) and Ki67<sup>+</sup> (**Figure 7C**) cells with time, albeit with delayed inactivation kinetics  
351 when compared to young MuSCs (**Figure 7C-D**). To further evaluate the quiescent-like state of  
352 the engrafted MuSC populations, we quantified the morphology of individual Pax7<sup>+</sup> donor cells at  
353 7 DPE. On average, aged donor cells had reduced max/min feret diameter ratio and nuclear  
354 eccentricity when compared to young cells at this timepoint, which correlates to the more  
355 contracted/rounded morphological characteristics of activated MuSCs (**Figure 7E-G**).

356 We next pursued a potential rescue of the aged MuSC phenotypes we observed in our  
357 engineered cultures. Recent work showed that FoxO transcription factors (TFs) are responsible  
358 for conferring a ‘genuine’ quiescent state to MuSCs, whereby genetic ablation resulted in a shift  
359 towards a ‘primed’ state.<sup>54</sup> Furthermore, FoxO activity was computationally predicted to be  
360 regulated by the Igf-Akt pathway, where phosphorylated-Akt causes the phosphorylation of FoxO  
361 transcription factors and their translocation to the cytoplasm. Pharmacological inhibition of the  
362 AKT pathway using the phosphatidylinositol 3 kinase (PI3K) inhibitor, wortmannin, resulted in  
363 increased stemness in primed young MuSCs. Whether this treatment strategy is capable of rescuing  
364 aged MuSCs is currently unknown; providing an opportunity to leverage our culture model to  
365 uncover new biology. First, we confirmed that compared to young MuSCs, aged MuSCs presented  
366 increased proliferation and reduced FoxO3a nuclear fluorescent intensity in 2D culture. In this  
367 context, wortmannin treatment (10 μM) blunted cell proliferation and increased FoxO3a nuclear  
368 localization in both young and aged MuSCs (**Supplementary Figure 12A-C**). Indeed, FoxO3a  
369 nuclear fluorescent intensity was comparable between young and aged MuSCs following  
370 wortmannin treatment (**Supplementary Figure 12B**).

371 We then introduced wortmannin to 3D myotube cultures engrafted with young or aged  
372 MuSCs. With this treatment, the aged MuSCs maintained a stable Pax7<sup>+</sup> donor population size  
373 over time, now indistinguishable from the untreated young MuSCs cultures (**Figure 7A-B**).  
374 Indeed, the proportions of Ki67<sup>+</sup> and c-FOS<sup>+</sup> in the aged Pax7<sup>+</sup> population showed comparable  
375 kinetics to the young untreated donor MuSCs (**Figure 7C-D**). As well, the treatment encouraged  
376 a greater proportion of young MuSCs to inactivate, and with more rapid kinetics (**Figure 7C**). We  
377 also found a trending decrease in donor cell GFP<sup>+</sup> signal covering tissues at 7 DPE in wortmannin  
378 treated conditions, suggesting reduced differentiation (**Supplementary Figure 13**). Finally,  
379 morphological characterization of wortmannin treated aged MuSCs at 7 DPE showed no change  
380 in average max/min feret diameter ratio, whereas we found a rescue of nuclear eccentricity that

381 matched young MuSCs (**Figure 7E-G**). There were no shifts in the morphological profile of young  
382 MuSCs treated with wortmannin (**Figure 7E-G**).

383 Thus, by introducing aged MuSCs into a young myotube niche we revealed abnormal  
384 population maintenance, delays in the inactivation kinetics, and morphological features  
385 characteristic of activated MuSCs, which we show can be rescued by modulating AKT signalling,  
386 a pathway shown by others to regulate quiescence in young MuSCs.

387

## 388 **Discussion**

389 We have developed an *in vitro* functional assay that rapidly induces and sustains MuSC  
390 inactivation, enabling systematic analyses of cellular and molecular mechanisms presiding over  
391 the return to quiescence for the first time. MuSCs acquired *in vivo*-like hallmarks of quiescence,  
392 that, to our knowledge have never before been reported *in vitro*. Through temporal single cell  
393 analyses, we uncovered evidence of population-level adaptations to the muscle tissue niche and  
394 functionally heterogenous MuSC sub-populations mirroring *in vivo* heterogeneous activities. We  
395 also demonstrate the value proposition of the assay by introducing MuSCs from aged animals and  
396 revealing multiple functional deficits tied to an aberrant quiescent state, which we show are  
397 rescued by wortmannin treatment, a quiescence-reinforcing strategy previously tested on “primed”  
398 MuSCs from young animals.<sup>54</sup> These breakthroughs, together with the modularity of the assay  
399 components, miniaturized format, and validated semi-automated workflows to capture and process  
400 phenotypic data, offers an unprecedented opportunity to advance our understanding of MuSC  
401 quiescence and regulation in iterated designer niches.

402

403 In spite of a stress-induced response to tissue digestion and cell sorting<sup>21</sup>, our data  
404 demonstrate that the primary response of most MuSCs introduced to the biomimetic niche is  
405 immediate inactivation. A small proportion enter cell-cycle prior to inactivation and an even  
406 smaller subset directly differentiate and fuse with myotubes in the template. The MuSC population  
407 is increasingly regarded as encompassing a continuum of quiescence to activation<sup>19</sup>, and we  
408 believe our assay captures this continuum-influenced functional heterogeneity. For example, we  
409 expect those MuSCs closer to activation were inclined to differentiate and fuse, while those closer  
410 to a deeply quiescent state were resistant to activation cues. Additionally, Pax7<sup>+</sup> donor cells at 7  
411 DPE expressing CalcR and/or polarized niche markers represent a little over one-tenth of the  
412 population, hinting that a subset of more naive MuSCs are those recapitulating the more  
413 “advanced” hallmarks of quiescence we observed at 7 DPE. This is particularly intriguing taken  
414 with studies by others attributing a bonafide stem cell status to a similar proportion of MuSCs  
415 within the total population.<sup>8,37,54,58</sup> Indeed, taken together with our observation that a subpopulation  
416 of engrafted donor MuSCs never enter cell cycle (**Figure 3**), we proposit that the biomimetic niche  
417 maintains a “genuine-like” quiescent MuSC population alongside a more “primed-like” MuSC

418 population, therein offering a tractable culture system with which to identify biochemical and  
419 biophysical regulators of these unique states.

420

421 Engrafted MuSCs showed population-level control over their response to the niche, which  
422 opens up enticing possibilities for studies of MuSC pool size regulation, and to uncover rules  
423 dictating niche repopulation. Of which increased differentiation was recently recognized as a  
424 quality control mechanism *in vivo*, similar to our own studies.<sup>59</sup> As well, rules of niche occupancy  
425 also extoll limits on the number of transplanted MuSCs that can engraft into a recipient muscle.<sup>60</sup>  
426 The data presented also underscores the importance of myotubes encased in a 3D matrix in  
427 allowing a persistent Pax7<sup>+</sup> pool, and for determining the niche occupancy plateau point, despite  
428 a differentiation-inducing culture milieu and the absence of any other cell types. This is perhaps  
429 not surprising as many studies tout a role for myofibers in preserving or inducing quiescence, and  
430 in controlling MuSC pool size.<sup>61–64</sup> A feedback mechanism between myofibers and MuSCs that is  
431 linked to nuclear content is suspected<sup>64</sup>; the likes of which could be interrogated in our system.

432

433 MuSCs *in situ* display long cytoplasmic projections that were initially described from  
434 electron microscopy analyses<sup>65</sup>, and more recently evaluated using tissue clearing and intravital  
435 imaging methodologies<sup>12,47,48</sup>. The elaborate MuSC morphologies arising in our cultures offer a  
436 new opportunity to explore the cellular and molecular mechanisms driving the acquisition of  
437 quiescent-like morphologies, but also the relevance of this phenotypic feature on MuSC behavior  
438 and fate. Indeed, long elaborated cytoplasmic projections have been associated with a deeper  
439 quiescent state<sup>48</sup>, and have been ruled out as a migratory apparatus<sup>47</sup>, favoring instead a role in  
440 ‘niche sensing’, though that remains to be determined.<sup>47,48</sup> Quite surprisingly, we found that  
441 acquisition of quiescent-like morphologies and anatomical hallmarks was dependent on  
442 interactions between MuSCs and their immediate niche, occurring in the absence of other resident  
443 muscle cell types. The modular culture assay described herein enables iterative study design and  
444 independent molecular perturbations to the niche (myotubes) and the MuSCs to break open  
445 knowledge in this area. Indeed, leveraging high-content imaging and CellProfiler<sup>TM</sup> workflows for  
446 relating morphometric features to fate signatures, we offer proof of concept support for the use of  
447 morphological features as a non-invasive readout of MuSC quiescence status in our model, thereby  
448 facilitating future phenotypic screens.

449

450 To date, characterization of functional deficits of aged MuSC populations *in vitro* have  
451 focused on proliferation and colony formation as readouts<sup>53,57,66–69</sup>, and studies of other recognized  
452 deficiencies have been restricted to *in vivo* studies. In recent years, aged MuSC regenerative  
453 deficits have been linked to the notion that with age there is a progressive decrease in truly  
454 quiescent cells in favor of a greater number of cells in a pre-activated state.<sup>20,55,56,70</sup> Consistent  
455 with functional consequences expected of a pre-activated state, we noted aberrant expansion  
456 activity at early culture timepoints from a subset of the aged MuSCs seeded within our assay, and  
457 a trend towards increased differentiation at later time-points, that were not observed in young

458 MuSC cultures. Our studies also uncovered delayed inactivation kinetics and also in the acquisition  
459 of quiescent-like features. This suggests that a subset of aged MuSCs were unable to properly  
460 sense and respond to the pro-quiescent environment. Furthermore, the aged MuSC population was  
461 unable to maintain a steady-state pool size, which may imply that MuSC pool regulation is at least  
462 partly cell intrinsic and is dependent on both the activation state of MuSCs under steady-state  
463 conditions and exposure to activation-inducing cues. Interestingly, the myoblasts used to fabricate  
464 all of the muscle tissues for this study were derived from young mice, meaning that the aged  
465 MuSCs were exposed to a young niche. We cannot rule out the possibility that the young  
466 biomimetic muscle niche partially rescued aged MuSC function, as has been reported by  
467 others<sup>71,72</sup>. Indeed, we anticipate that aged MuSCs introduced to muscle tissues fabricated from  
468 myoblasts derived from aged donors and/or exposed to an aging systemic environment will induce  
469 further functional decline.

470  
471 Finally, we found that inhibiting Akt signaling restores aged MuSC inactivation kinetics  
472 and population control, and partially rescues quiescent-like features. Our study extends prior work  
473 in showing that a strategy demonstrated to confer a genuine quiescent state onto young, activated  
474 MuSCs has a similar effect on aged MuSCs. We show that a decline in nuclear FoxOa3 levels is  
475 detected in MuSCs at an earlier age than previously thought, and that the nuclear FoxOa3  
476 expression is corrected to youthlike levels by the wortmannin treatment. Wortmannin treated had  
477 only subtle influence on young MuSCs, which may reflect an absence stimulatory niche-derived  
478 ligands.<sup>54</sup> However, we note that the DM culture media contains insulin, and the young and aged  
479 MuSCs were each cultured within young muscle tissues.

480  
481 To conclude, herein we report a culture model capable of recapitulating aspects of  
482 quiescent MuSC biology, in youth and in age, that were previously not possible to study *in vitro*.  
483 By contrast to all other 3D culture systems where the cellular and ECM components are mixed  
484 together and introduced at the start of the experiment<sup>27,29-32,73-75</sup>, our method is modular. Amongst  
485 the merits of this distinction is the ability to introduce and evenly distribute new cellular  
486 components at any point in the assay. It is also feasible to genetically modify the MuSC and  
487 myoblast components in different ways, and maintain these distinctions, when MuSCs are  
488 introduced to the muscle tissue after myotubes have formed. These advantages, together with the  
489 simplicity of the approach, assay compatibility with existing semi-automated high content image  
490 acquisition and analysis tools, and high value features of MuSC biology captured by the system,  
491 offer a unique opportunity to expand MuSC fundamental knowledge and identify molecular targets  
492 to protect MuSC function as animals age.

493

494

495

496

## 497 **Materials and Methods**

### 498 **Animal use protocols and ethics**

499 All animal use protocols were reviewed and approved by the local Animal Care Committee (ACC)  
500 within the Division of Comparative Medicine (DCM) at the University of Toronto. All methods in  
501 this study were conducted as described in the approved animal use protocols (#20012838) and  
502 more broadly in accordance with the guidelines and regulations of the DCM ACC and the  
503 Canadian Council on Animal Care. 129-Tg(CAG-EYFP)7AC5Nagy/J (Actin-eYFP) mice<sup>38</sup> were  
504 purchased from the Jackson Laboratory by the lab of Dr. Derek van der Kooy and shared with our  
505 group. Tg:Pax7-nEGFP (i.e. Pax7-nGFP) mice were a gift from Dr. Shahragim Tajbakhsh<sup>76</sup>, kindly  
506 transferred from the laboratory of Dr. Michael Rudnicki at the Ottawa Hospital Research Institute.  
507 Unless otherwise indicated, 8-12 weeks old mice were used for all experiments. A breeding pair  
508 of CB6-Tg(CAG-EGFP/CETN2)3-4Jgg/J (Centrin 2-eGFP) transgenic mice<sup>77</sup> were kindly shared  
509 by Jeffrey Martens (University of Florida), and maintained by breeding for use in the aging  
510 studies. Young mice were between 4-5 months and aged mice between 24-26 months old.

511

### 512 **Magnetic-activated cell sorting (MACS) of primary mouse muscle stem cells**

513 Primary mouse MuSCs were isolated from mouse hindlimb muscle using a modified method  
514 previously reported by our group.<sup>33</sup> Briefly,  $\approx$ 1 gram of muscle tissues was dissected from the  
515 hindlimb muscles of a humanely euthanized mouse and placed into a GentleMACS dissociation  
516 tube (Miltenyi Biotec, #130-096-334). 7 mL of DMEM (Gibco, #11995-073) with 630 U/mL Type  
517 1A collagenase from clostridium histolyticum (Sigma, #C9891) was added to the tube, and the  
518 sample was physically dissociated using a GentleMACS dissociator (Miltenyi Biotec, #130-096-  
519 334) using the “skeletal muscle” setting. The tube was then placed on an orbital shaker in a 37 °C  
520 incubator for 1-hour. The digested tissue was triturated 10 times through a 10 mL pipette, after  
521 which an additional 440 U of Type 1A collagenase was added along with Dispase II (Life  
522 Technologies, #17105041) and DNase I (Bio Basic, #9003-98-9) at a final concentration of 0.04  
523 U/mL and 100  $\mu$ g/mL, respectively. The tube was again placed on an orbital shaker in a 37 °C  
524 incubator for 1-hour. The sample was then slowly passed through a 20 G needle 15 times and then  
525 resuspended in 7 mL of FACS buffer (**Supplementary Table 1**). The solution was passed through  
526 a 70  $\mu$ m cell strainer (Miltenyi Biotec, #130-098-462) followed by a 40  $\mu$ m cell strainer (Corning,  
527 #352340). The filtered mixture was then centrifuged at 400 g for 15 minutes and the supernatant  
528 aspirated. The pellet was resuspended in 1 mL of 1X red blood cell (RBC) lysis buffer  
529 (**Supplementary Table 1**) and then incubated at room temperature (RT) for 8 minutes. 9 mL of  
530 FACS buffer was added to the tube and the mixture was centrifuged at 400 g for 15 minutes  
531 followed by supernatant aspiration.

532 The cell pellet was then incubated in a 4 °C fridge with rocking for 15 minutes in 100  $\mu$ L  
533 of MACS buffer and 25  $\mu$ L of lineage depletion microbeads from the Satellite Cell Isolation Kit  
534 (Miltenyi Biotec, #130-104-268) according to the manufacturer’s instructions. Another 375  $\mu$ L of  
535 MACS buffer was then added, and the lineage positive cells depleted by flowing the solution, by

536 gravity, through an LS column in a magnetic field (Miltenyi Biotec, #130-042-401)  
537 (**Supplementary Table 1**). The resulting flow through was collected, corrected to 5 mL and then  
538 centrifuged at 400 g for 5 minutes. The pellet was then subjected to a second round of lineage  
539 depletion using a fresh LS column in a magnetic field. The flow through was corrected to 5 mL,  
540 centrifuged, followed by supernatant aspiration, and then the cell pellet was resuspended in 100  
541  $\mu$ L of MACS buffer and 25  $\mu$ L of anti-integrin  $\alpha$ -7 microbeads (Miltenyi Biotec, #130-104-261)  
542 for incubation at 4 °C for 15 minutes. 375  $\mu$ L MACS buffer was added, and the integrin  $\alpha$ -7<sup>+</sup> was  
543 enriched by running the solution through a third LS column in a magnetic field. In this instance,  
544 the flow through was discarded, the column was removed from the magnetic field and then flushed  
545 with 5 mL of MACS buffer which was collected in a 15 mL conical tube. The tube was spun to  
546 generate a cell pellet enriched for integrin  $\alpha$ -7<sup>+</sup> MuSCs. To establish and validate the protocol,  
547 which differs from the manufacturers protocol by the introduction of extra lineage depletion steps,  
548  $\alpha$ -7<sup>+</sup> MuSCs were isolated from Pax7-nGFP transgenic mice. In these experiments the cell pellet  
549 was resuspended in 0.5 mL FACS buffer and incubated with DRAQ5 for 15 min at RT. After 3 x  
550 5 min FACS buffer washes and centrifuge spins, the pellet was resuspended in 0.5 mL of FACS  
551 buffer and propidium iodide (PI) was added to the tube. The resuspended cells were then evaluated  
552 using the Accuri C6 Flow Cytometer (BD Biosciences) whereby we collected 30,000 events. The  
553 DRAQ5<sup>+</sup>Pax-nGFP<sup>+</sup>PI<sup>-</sup> cell population was quantified from the flow cytometric data using  
554 FlowJo™ V10 software.

555

#### 556 **Primary mouse myoblast line derivation and maintenance**

557 Prior myoblast cell lines were derived from freshly MACS enriched integrin  $\alpha$ -7<sup>+</sup> MuSC  
558 populations. 1-day before cell plating, culture dishes were coated at 4 °C overnight with collagen  
559 I at a 1:8 concentration diluted in ddH<sub>2</sub>O (Gibco, #A10483-01). The next day, excess collagen I  
560 solution was removed, and the dish culture surfaces were dried at RT for 15-20 min followed by a  
561 PBS wash prior to use. Immediately after MACS isolation, lineage depleted integrin  $\alpha$ -7<sup>+</sup> enriched  
562 MuSCs were resuspended in SAT10 media (**Supplementary Table 1**) and plated into collagen-  
563 coated dishes. A full media change was performed 48 hours after plating with half media changes  
564 every 2 days thereafter. Cells were grown to 70 % confluency and passaged at least 5 times to  
565 produce a primary mouse myoblast line, and then used from passage 5 – 9 for experiments.

566

#### 567 **Murine myotube template fabrication and MuSC seeding**

568 One day prior to seeding myotube templates, black 96-well clear bottom plates (PerkinElmer,  
569 #6055300) were coated with 5 % pluronic acid (Sigma-Aldrich, #P2443) and incubated overnight  
570 at 4 °C. The next day, excess pluronic solution was removed, and plates were left at RT for 15 –  
571 20 min to dry well surfaces. Cellulose paper (MiniMinit) was cut into 5 mm discs using a biopsy  
572 punch (Integra, #MLT3335), autoclaved, and then placed into pluronic acid coated wells of the  
573 96-well plate. A stock thrombin solution (100 U/mL, Sigma-Aldrich, #T6884) was then diluted to  
574 0.8 U/mL in PBS, and then 4  $\mu$ L was diffused into the paper discs and left to dry at RT. Meanwhile,  
575 a 10 mg/mL fibrinogen solution was made by dissolving lyophilized fibrinogen (Sigma-Aldrich,

576 #F8630) in a 0.9 % wt/vol solution of NaCl (Sigma-Aldrich, #S5886) and then filtered through a  
577 0.22  $\mu\text{m}$  syringe filter (Sarstedt, #83.1826.001). Primary myoblasts were then trypsinized, counted  
578 using a hemacytometer, and then resuspended in an ECM-mimicking slurry comprised of 40 %  
579 DMEM, 40 % Fibrinogen, and 20 % Geltrex<sup>TM</sup> (ThermoFisher, #A1413202) at a concentration of  
580 25,000 cells per 4  $\mu\text{L}$ . The cell / extracellular matrix solution was then diffused into dry thrombin-  
581 containing paper discs and left to gel at 37 °C for 5 min. 200  $\mu\text{L}$  growth media (GM,  
582 **Supplementary Table 1**) was introduced to each hydrogel containing culture well and plates were  
583 returned to a cell culture incubator (37 °C, 5 % CO<sub>2</sub>) for 2 days (Day -2 to 0). On Day 0 of  
584 differentiation, a full media change was conducted to transition cultures to differentiation media  
585 (DM, **Supplementary Table 1**). Half media changes with DM were performed every other day  
586 from thereafter.

587 Unless otherwise indicated, on Day 5 of myotube template culture integrin  $\alpha$ -7<sup>+</sup> MuSCs  
588 were prospectively isolated and resuspended in SAT10 media replete of FGF2. Myotube templates  
589 were carefully removed from the 96-well plate using tweezers and placed in an ethanol-sterilized  
590 plastic container containing long strips of polydimethylsiloxane (PDMS) sitting on top of a moist  
591 paper towel. Quickly, 4  $\mu\text{L}$  of the resuspended MuSC solution containing the desired number of  
592 MuSCs was placed onto each tissue and evenly spread over the tissue surface using a cell-spreader.  
593 The plastic container was then sealed with a tight fitting lid and placed in the 37 °C incubator for  
594 1 hour before putting the tissues back into their wells using tweezers. For aged MuSC-related  
595 studies, minced and cryopreserved hindlimb muscle from young or litter-matched aged Centrin 2-  
596 eGFP mice<sup>77</sup> were thawed and underwent the MACS protocol detailed above. The MuSCs were  
597 then resuspended in SAT10 media replete of FGF2 but with added wortmannin (10  $\mu\text{M}$ , Sigma-  
598 Aldrich, #W1628) or a dimethyl sulfoxide (DMSO) control (Sigma-Aldrich, #D8418). 4  $\mu\text{L}$  of the  
599 resuspended MuSCs containing  $\approx$ 500 cells were subsequently seeded onto individual tissues. After  
600 1 hour, tissues were put back into their wells. The wortmannin (or DMSO) was then added to the  
601 culture media (also at 10  $\mu\text{M}$ ) and refreshed every other day during media changes.

602

### 603 **Tissue fixation and immunolabelling**

604 At the indicated tissue endpoints, samples were quickly washed 3x with PBS before fixation with  
605 100  $\mu\text{L}$  of 4 % paraformaldehyde (PFA, Fisher scientific, #50980494) for 12 min at RT. After 3 x  
606 10 min washes with cold PBS (4 °C), blocking and permeabilization was performed using 100  $\mu\text{L}$   
607 of blocking solution (**Supplementary Table 1**) for 30 min at RT. Afterwards, primary antibodies  
608 were diluted in blocking solution as indicated in **Supplementary Table 2** and 50  $\mu\text{L}$  was added to  
609 each tissue and incubated overnight at 4 °C. After 3 x 10min washes with cold PBS, tissues were  
610 incubated for 45 min at RT in 50  $\mu\text{L}$  of secondary antibodies and molecular probes diluted in  
611 blocking solution (see **Supplementary Table 2**), followed by 3 x 10 min washes with cold PBS.  
612 A limitation of the cellulose papers is that they cast autofluorescence in the blue channel, which  
613 can give off intense background noise. Therefore, for nuclei detection, DAPI was sometimes used  
614 as the signal intensity was generally high enough to allow thresholding of paper fibers out of  
615 confocal images. Batch to batch differences in DAPI, or in cases when tissues become dry during



616 staining, can result in DAPI images where the cellulose fibers are visualized, although even in  
617 these cases the nuclei can still be clearly discerned.

618

### 619 **Image acquisition**

620 Confocal imaging was performed using the Perkin-Elmer Operetta CLS High-Content Analysis  
621 System and the associated Harmony® software. Prior inserting the 96-well plate into the Operetta,  
622 the PBS was removed from the wells of the plate to prevent tissues from shifting during imaging,  
623 and they were carefully positioned in the middle of the wells using tweezers. For stitched pictures,  
624 images were collected using the 10X air objective (Two Peak autofocus, NA 1.0 and Binning of  
625 1). For MuSC analysis, images were collected using the 20X and 40X water immersion objectives  
626 (Two Peak autofocus, NA 1.0 and 1.1, and Binning of 1). All images were exported off the  
627 Harmony® software in their raw form. Subsequent stitching, max projections, etc was performed  
628 using the ImageJ-BIOP Operetta Import Plugin available on c4science.<sup>78</sup> For imaging of MuSC  
629 niche markers, the Olympus FV-1000 confocal microscope and Olympus FluoView V4.2b  
630 imaging software was used along with a 40X silicone immersion objective (NA 1.25; Olympus,  
631 #UPLSAPO40XS).

632

### 633 **Bio-image analysis**

634 For SAA coverage, stitched images were used along with a previously published ImageJ macro.<sup>79</sup>  
635 The SAA signal was put in red, the threshold set to 0-45 and the tissue outline selected using the  
636 oval tool. For fusion index, cell counting, cell morphology, YFP/GFP coverage and mean nuclear  
637 intensity, the CellProfiler™ software was utilized. CellProfiler™ version 4.2.1<sup>49</sup> was downloaded  
638 from source website ([www.cellprofiler.org](http://www.cellprofiler.org)) and installed on a PC (Intel Core i9-11900 @ 2.5GHz,  
639 64.0 GB RAM, and 64-bit Windows 11 operating system). Analysis pipelines were created for  
640 each of the above-mentioned metrics. *Fusion index*: 9 x 20X max projected images were taken per  
641 tissue. The channels were split, the fiber and nuclei signal individually identified and overlaid to  
642 calculate the percentage of nuclei in fibers. *Cell counting and morphology*: 25 x 20X max projected  
643 images were taken per tissue. The channels were split, mononucleated DAPI<sup>+</sup>YFP<sup>+</sup>Pax7<sup>+</sup> (or  
644 Caveolin-1<sup>+</sup>) objects extracted using the IdentifyPrimaryObjects module and counted. For object  
645 segmentation, the global minimum cross-entropy thresholding method<sup>80</sup> was selected. Pixel  
646 intensity and object shape were used as metrics to distinguish and segment clumped objects.  
647 Morphology measurements of the identified cellular objects were recorded using the  
648 MeasureObjectSizeShape module. For the proportion of c-FOS<sup>+</sup>, Ki67<sup>+</sup>, MyoD<sup>+</sup> and/or CalcR<sup>+</sup>  
649 cells, this fourth channel was overlaid over the identified objects and divided. *YFP/GFP*  
650 *coverage*: 25 x 20X max projected images were taken per tissue. The channels were split, the  
651 YFP/GFP signal identified, and coverage calculated using the MeasureAreaOccupied function.  
652 *Mean nuclear intensity*: 104 x 40X max projected images were taken per well. The channels were  
653 split, the nuclei, cell and cytoplasm identified as primary, secondary and tertiary objects, and the  
654 intensity of the FoxO3a signal within the nuclei calculated using the MeasureObjectIntensity  
655 function.

656 **MTS assay**

657 To quantify the metabolic activity of myotube templates, the MTS assay was used (abcam,  
658 #ab197010). First, 200  $\mu$ L of fresh DM was added to each tissue. Then, 20  $\mu$ L of the MTS  
659 tetrazolium compound was added to each well and incubated for 2 hours at 37 °C. The media was  
660 vigorously mixed with a pipette every 30 min to ensure maximal diffusion of the formazan dye  
661 product. The entire culture media from each tissue was then pipetted into a clear 96-well plate  
662 (Sarstedt, #83.3924) and the OD at 490 nm quantified with a spectrophotometer (Tecan, Infinite  
663 M200 Pro). The assay was performed on different tissues on different days of culture, each with  
664 their own “media + MTS” negative control, which was subtracted as background from all OD  
665 values.

666  
667 **EdU assay experiments**

668 EdU experiments were performed using the Invitrogen Click-iT™ Plus EdU Alexa Fluor™ 555  
669 Imaging Kit (#C10638). EdU was added to the culture media on Day 5 after MuSC engraftment  
670 and refreshed every 24 hours until 7 DPE. After tissue fixation and blocking, EdU labelling was  
671 done according to the product protocol apart from a 20 min incubation instead of 30 min.  
672 Subsequent immunolabelling was done as described above. The CellProfiler™ pipeline was then  
673 implemented to identify mononucleated DAPI<sup>+</sup>YFP<sup>+</sup>Ki67<sup>-</sup> objects and then overlaid with the  
674 EdU channel to quantify the proportion of EdU positive cells.

675  
676 **Barium chloride tissue injury**

677 On Day 12 of differentiation (7 DPE), the culture media was removed, and tissues were incubated  
678 with either PSS (**Supplementary Table 1**) or a 2.4 % wt/v BaCl<sub>2</sub> solution diluted in PSS for a  
679 period of 4 hours (protocol adapted from previously published literature<sup>81</sup>). Tissues were then  
680 washed 3 x 5 min with warm wash media (**Supplementary Table 1**) and then returned to fresh  
681 DM for 2 more days before fixation.

682  
683 **2D culture experiments**

684 For 2D myotube culture experiments, microwells were first coated with a 5 % v/v  
685 Geltrex™/DMEM solution for 1 hour at 37 °C. After drying, 25,000 primary myoblasts were  
686 added per well in 200  $\mu$ L of GM, which was then switched to DM after 2 days. On day 5 of  
687 differentiation, 500 MuSCs were engrafted onto 2D myotubes in a 4  $\mu$ L volume.

688  
689 **Statistical analysis**

690 Statistical analysis was performed using the GraphPad Prism 9 software. Most experiments were  
691 performed with 3 technical tissue replicates per experimental group and repeated on 3 independent  
692 occasions (i.e., n=9 technical replicates across N=3 biological replicates). Please refer to  
693 **Supplementary Table 3** for a specific breakdown of replicates per experiment. All error bars  
694 show standard error of the mean (SEM). Significance was defined as  $p \leq 0.05$

695

696 **Acknowledgements**

697 This project was funded by a CIHR CGS-D scholarship to E.J., an Ontario Graduate Scholarship  
698 to E.J., a Cecil Yip Doctoral Award to E.J., a Medicine by Design Canada First Research  
699 Excellence Fund grant to P.M.G. (MbDC2-2019-02), and a Canada Research Chair in Endogenous  
700 Repair to P.M.G.

701

702 **Author contributions**

703 E.J. and PMG conceived of the project. E.J. and Y.K. designed and performed research, analyzed  
704 data, and prepared figures. P.M.G. supervised the research. All authors contributed to data  
705 interpretation. E.J., Y.K., and P.M.G. wrote the manuscript. All authors reviewed and approved  
706 the manuscript.

707

708 **Conflict of interest**

709 The authors have no competing interests, or other interests that might be perceived to influence  
710 the results and/or discussion reported in this paper.

711

712 **References**

- 713 1. Lepper C, Partridge TA, Fan C. An absolute requirement for Pax7-positive satellite cells  
714 in acute injury-induced skeletal muscle regeneration. *Development*. 2011;138:3639-3646.  
715 doi:10.1242/dev.067595
- 716 2. Murphy MM, Lawson JA, Mathew SJ, Hutcheson DA, Kardon G. Satellite cells ,  
717 connective tissue fibroblasts and their interactions are crucial for muscle regeneration.  
718 *Development*. 2011;3637:3625-3637. doi:10.1242/dev.064162
- 719 3. Sambasivan R, Yao R, Kissenpfennig A, et al. Pax7-expressing satellite cells are  
720 indispensable for adult skeletal muscle regeneration. *Development*. 2011;138(4333).  
721 doi:10.1242/dev.073601
- 722 4. Günther S, Kim J, Kostin S, Lepper C, Fan CM, Braun T. Myf5-Positive Satellite Cells  
723 Contribute to Pax7-Dependent Long-Term Maintenance of Adult Muscle Stem Cells. *Cell*  
724 *Stem Cell*. 2013;13(5):590-601. doi:10.1016/j.stem.2013.07.016
- 725 5. Von Maltzahn J, Jones AE, Parks RJ, Rudnicki MA. Pax7 is critical for the normal  
726 function of satellite cells in adult skeletal muscle. *PNAS*. 2013;110(41):16474-16479.  
727 doi:10.1073/pnas.1307680110
- 728 6. Chakkalakal J V, Christensen J, Xiang W, et al. Early forming label-retaining muscle stem  
729 cells require p27 kip1 for maintenance of the primitive state. *Development*.

- 730 2014;141:1649-1659. doi:10.1242/dev.100842
- 731 7. Cutler AA, Pawlikowski B, Wheeler JR, et al. The regenerating skeletal muscle niche  
732 drives satellite cell return to quiescence. *ISCIENCE*. 2022:104444.  
733 doi:10.1016/j.isci.2022.104444
- 734 8. Rocheteau P, Gayraud-Morel B, Siegl-Cachedenier I, Blasco MA, Tajbakhsh S. A  
735 subpopulation of adult skeletal muscle stem cells retains all template DNA strands after  
736 cell division. *Cell*. 2012;148(1-2):112-125. doi:10.1016/j.cell.2011.11.049
- 737 9. Machado L, de Lima JE, Fabre O, et al. In Situ Fixation Redefines Quiescence and Early  
738 Activation of Skeletal Muscle Stem Cells. *Cell Rep*. 2017;21:1982-1993.  
739 doi:10.1016/j.celrep.2017.10.080
- 740 10. Pillon NJ, Gabriel BM, Dollet L, et al. Transcriptomic profiling of skeletal muscle  
741 adaptations to exercise and inactivity. *Nat Commun*. 2020;11(1). doi:10.1038/s41467-019-  
742 13869-w
- 743 11. Quarta M, Brett JO, Dimarco R, et al. An artificial niche preserves the quiescence of  
744 muscle stem cells and enhances their therapeutic efficacy. *Nat Biotechnol*. 2016;34(7).  
745 doi:10.1038/nbt.3576
- 746 12. Verma M, Asakura Y, Murakonda BSR, et al. Muscle Satellite Cell Cross-Talk with a  
747 Vascular Niche Maintains Quiescence via VEGF and Notch Signaling. *Cell Stem Cell*.  
748 2018;23:530-543.e9. doi:10.1016/j.stem.2018.09.007
- 749 13. Mauro A. Satellite cell of skeletal muscle fibers. *J Biophys Biochem Cytol*. 1961;9(2).
- 750 14. Velthoven CTJ Van, Rando TA. Stem Cell Quiescence : Dynamism, Restraint, and  
751 Cellular Idling. *Cell Stem Cell*. 2019;24. doi:10.1016/j.stem.2019.01.001
- 752 15. Crist CG, Montarras D, Buckingham M. Muscle Satellite Cells Are Primed for  
753 Myogenesis but Maintain Quiescence with Sequestration of Myf5 mRNA Targeted by  
754 microRNA-31 in mRNP Granules. *Cell Stem Cell*. 2012;11(1):118-126.  
755 doi:10.1016/j.stem.2012.03.011
- 756 16. Baghdadi MB, Tajbakhsh S. Regulation and phylogeny of skeletal muscle regeneration.  
757 *Dev Biol*. 2018;433:200-209. doi:10.1016/j.ydbio.2017.07.026
- 758 17. Murach KA, Fry CS, Dupont- EE, Mccarthy JJ, Peterson CA. Fusion and beyond :  
759 Satellite cell contributions to loading- - induced skeletal muscle adaptation. *FASEB J*.  
760 2021;35(e21893):1-15. doi:10.1096/fj.202101096R

- 761 18. Rudnicki MA, Le Grand F, McKinnell I, Kuang S. The Molecular Regulation of Muscle  
762 Stem Cell Function. *Cold Spring Harb Symp Quant Biol.* 2008;LXXIII:323-331.
- 763 19. Ancel S, Stuelsatz P, Feige JN. Muscle Stem Cell Quiescence: Controlling Stemness by  
764 Staying Asleep. *Trends Cell Biol.* 2021;1-13. doi:10.1016/j.tcb.2021.02.006
- 765 20. Chakkalakal J V, Jones KM, Basson MA, Brack AS. The aged niche disrupts muscle stem  
766 cell quiescence. *Nature.* 2012;490(7420):355-360. doi:10.1038/nature11438
- 767 21. Machado L, Geara P, Camps J, et al. Tissue damage induces a conserved stress response  
768 that initiates quiescent muscle stem cell activation. *Cell Stem Cell.* 2021;28:1-11.  
769 doi:10.1016/j.stem.2021.01.017
- 770 22. Charville GW, Cheung TH, Yoo B, et al. Ex Vivo Expansion and In Vivo Self-Renewal of  
771 Muscle Stem Cells. *Stem Cell Reports.* 2015;5:621-632. doi:10.1016/j.stemcr.2015.08.004
- 772 23. Arjona M, Goshayeshi A, Rodriguez-mateo C, et al. Tubastatin A maintains adult skeletal  
773 muscle stem cells in a quiescent state ex vivo and improves their engraftment ability in  
774 vivo. *Stem Cell Reports.* 2022;17(1):82-95. doi:10.1016/j.stemcr.2021.11.012
- 775 24. Monge C, Distasio N, Rossi T, et al. Quiescence of human muscle stem cells is favored by  
776 culture on natural biopolymeric films. *Stem Cell Res Ther.* 2017;8(104).  
777 doi:10.1186/s13287-017-0556-8
- 778 25. Anne B, Hamann M, Bernheim L, Bochaton-Piallat M-L, Gabbiani G, Bader CR.  
779 Identification of self-renewing myoblasts in the progeny of single human muscle satellite  
780 cells. *Differentiation.* 1996;60(1):47-57. doi:10.1046/j.1432-0436.1996.6010047.x
- 781 26. Yoshida N, Yoshida S, Koishi K, Masuda K, Nabeshima Y. Cell heterogeneity upon  
782 myogenic differentiation : down-regulation of MyoD and Myf-5 generates ‘ reserve cells  
783 .’ *J Cell Sci.* 1998;111:769-779.
- 784 27. Tiburcy M, Markov A, Kraemer LK, et al. Regeneration competent satellite cell niches in  
785 rat engineered skeletal muscle. *FASEB BioAdvances.* 2019;1(February):731-746.  
786 doi:10.1096/fba.2019-00013
- 787 28. Juhas M, Abutaleb N, Wang JT, et al. Incorporation of macrophages into engineered  
788 skeletal muscle enables enhanced muscle regeneration. *Nat Biomed Eng.*  
789 2018;2(December):942-954. doi:10.1038/s41551-018-0290-2
- 790 29. Fleming JW, Capel AJ, Rimington RP, et al. Bioengineered human skeletal muscle  
791 capable of functional regeneration. *BMC Biol.* 2020;18(145):1-16.

- 792 30. Rajabian N, Shahini A, Asmani M, et al. Bioengineered Skeletal Muscle as a Model of  
793 Muscle Aging and Regeneration. *Tissue Eng Part A*. 2021;27(1 and 2):74-86.  
794 doi:10.1089/ten.tea.2020.0005
- 795 31. Trevisan C, Fallas MEA, Maghin E, et al. Generation of a Functioning and Self-Renewing  
796 Diaphragmatic Muscle Construct. *Stem Cells Transl Med*. 2019;8:858-869.  
797 doi:10.1002/sctm.18-0206
- 798 32. Wang J, Broer T, Chavez T, et al. Myoblast deactivation within engineered human  
799 skeletal muscle creates a transcriptionally heterogeneous population of quiescent satellite-  
800 like cells. *Biomaterials*. 2022;284(April):121508. doi:10.1016/j.biomaterials.2022.121508
- 801 33. Davoudi S, Xu B, Jacques E, et al. MEndR : An In Vitro Functional Assay to Predict In  
802 Vivo Muscle Stem Cell-Mediated Repair. *Adv Funct Mater*. 2021;2106548:1-15.  
803 doi:10.1002/adfm.202106548
- 804 34. Gilbert PM, Blau HM. Engineering a stem cell house into a home. *Stem Cell Res Ther*.  
805 2011;2(3):1-9. doi:10.1186/scrt44
- 806 35. Fuchs E, Blau HM. Tissue Stem Cells : Architects of Their Niches. *Cell Stem Cell*.  
807 2020;27. doi:10.1016/j.stem.2020.09.011
- 808 36. Maesner CC, Almada AE, Wagers AJ. Established cell surface markers efficiently isolate  
809 highly overlapping populations of skeletal muscle satellite cells by fluorescence-activated  
810 cell sorting. *Skelet Muscle*. 2016;6(1):1-10. doi:10.1186/s13395-016-0106-6
- 811 37. Kuang S, Kuroda K, Le Grand F, Rudnicki MA. Asymmetric Self-Renewal and  
812 Commitment of Satellite Stem Cells in Muscle. *Cell*. 2007;129(5):999-1010.  
813 doi:10.1016/j.cell.2007.03.044
- 814 38. Hadjantonakis AK, MacMaster S, Nagy A. Embryonic stem cells and mice expressing  
815 different GFP variants for multiple non-invasive reporter usage within a single animal.  
816 *BMC Biotechnol*. 2002;2(11). doi:10.1186/1472-6750-2-11
- 817 39. Yamaguchi M, Watanabe Y, Ohtani T, et al. Calcitonin Receptor Signaling Inhibits  
818 Muscle Stem Cells from Escaping the Quiescent State and the Niche. *Cell Rep*.  
819 2015;13(2):302-314. doi:10.1016/j.celrep.2015.08.083
- 820 40. Baghdadi MB, Castel D, Machado L, et al. Reciprocal signalling by Notch-Collagen V-  
821 CALCR retains muscle stem cells in their niche. *Nature*. 2018;557(7707):714-718.  
822 doi:10.1038/s41586-018-0144-9

- 823 41. Robinson DCL, Ritso M, Nelson GM, et al. Negative elongation factor regulates muscle  
824 progenitor expansion for efficient myofiber repair and stem cell pool repopulation Article  
825 Negative elongation factor regulates muscle progenitor expansion for efficient myofiber  
826 repair and stem cell poo. 2021:1-16. doi:10.1016/j.devcel.2021.02.025
- 827 42. Gnocchi VF, White RB, Ono Y, Ellis JA, Zammit PS. Further characterisation of the  
828 molecular signature of quiescent and activated mouse muscle satellite cells. *PLoS One*.  
829 2009;4(4). doi:10.1371/journal.pone.0005205
- 830 43. Almada AE, Horwitz N, Price FD, et al. FOS licenses early events in stem cell activation  
831 driving skeletal muscle regeneration. *CellReports*. 2021;34(4):108656.  
832 doi:10.1016/j.celrep.2020.108656
- 833 44. Yue L, Wan R, Luan S, et al. Dek Modulates Global Intron Retention during Muscle Stem  
834 Cells Quiescence Exit. *Dev Cell*. 2020;53(6):661-676.e6.  
835 doi:10.1016/j.devcel.2020.05.006
- 836 45. Velthoven CTJ Van, Morree A De, Egner IM, Brett JO, Rando TA. Transcriptional  
837 Profiling of Quiescent Muscle Stem Cells In Vivo. *Cell Rep*. 2017;21:1994-2004.  
838 doi:10.1016/j.celrep.2017.10.037
- 839 46. Gilbert PM, Havenstrite KL, Magnusson KEG, et al. Substrate elasticity regulates skeletal  
840 muscle stem cell self-renewal in culture. *Science (80- )*. 2010;329(5995):1078-1081.  
841 doi:10.1126/science.1191035
- 842 47. Ma N, Chen D, Lee J, et al. Piezo1 regulates the regenerative capacity of skeletal muscles  
843 via orchestration of stem cell morphological states. *Sci Adv*. 2022;8(eabn0485):1-15.
- 844 48. Kann AP, Hung M, Wang W, et al. An injury-responsive Rac-to-Rho GTPase switch  
845 drives activation of muscle stem cells through rapid cytoskeletal remodeling. *Cell Stem*  
846 *Cell*. 2022;29:933-947. doi:10.1016/j.stem.2022.04.016
- 847 49. Stirling DR, Bowden MJS, Lucas AM, Carpenter AE, Cimini BA, Goodman A.  
848 CellProfiler 4: improvements in speed , utility and usability. *BMC Bioinformatics*.  
849 2021;22(433):1-11. doi:10.1186/s12859-021-04344-9
- 850 50. Kuang S, Gillespie MA, Rudnicki MA. Niche Regulation of Muscle Satellite Cell Self-  
851 Renewal and Differentiation. *Cell Stem Cell*. 2007;2:22-31.  
852 doi:10.1016/j.stem.2007.12.012
- 853 51. Brohl D, Vasyutina E, Czajkowski MT, et al. Colonization of the Satellite Cell Niche by

- 854 Skeletal Muscle Progenitor Cells Depends on Notch Signals. *Dev Cell*. 2012;23:469-481.  
855 doi:10.1016/j.devcel.2012.07.014
- 856 52. Goel AJ, Rieder M, Arnold H, et al. Niche Cadherins Control the Quiescence-to-  
857 Activation Transition in Muscle Stem Cells. *Cell Rep*. 2017;21:2236-2250.  
858 doi:10.1016/j.celrep.2017.10.102
- 859 53. Haroon M, Boers HE, Bakker AD, et al. Reduced growth rate of aged muscle stem cells is  
860 associated with impaired mechanosensitivity. *Aging (Albany NY)*. 2022;14:1-26.
- 861 54. García-prat L, Perdiguero E, Alonso-martín S, et al. FoxO maintains a genuine muscle  
862 stem-cell quiescent state until geriatric age. *Nat Cell Biol*. 2020;22(November).  
863 doi:10.1038/s41556-020-00593-7
- 864 55. Kimmel JC, Hwang AB, Scaramozza A, Marshall WF, Brack AS. Aging induces aberrant  
865 state transition kinetics in murine muscle stem cells. *Development*. 2020;147(dev183855).  
866 doi:10.1242/dev.183855
- 867 56. Kimmel JC, Yi N, Roy M, Hendrickson DG, Kelley DR. Differentiation reveals latent  
868 features of aging and an energy barrier in murine myogenesis. *Cell Rep*.  
869 2021;35(4):109046. doi:10.1016/j.celrep.2021.109046
- 870 57. Cosgrove BD, Gilbert PM, Porpiglia E, et al. Rejuvenation of the muscle stem cell  
871 population restores strength to injured aged muscles. *Nat Med*. 2014;20(3).  
872 doi:10.1038/nm.3464
- 873 58. Sousa-Victor P, García-prat L, Muñoz-Cánoves P. Control of satellite cell function in  
874 muscle regeneration and its disruption in ageing. *Nat Rev Mol Cell Biol*. 2021.  
875 doi:10.1038/s41580-021-00421-2
- 876 59. Wang X, Shelton SD, Bordieanu B, et al. Scinderin promotes fusion of electron transport  
877 chain dysfunctional muscle stem cells with myofibers. *Nat Aging*. 2022;2:155-169.  
878 doi:10.1038/s43587-021-00164-x
- 879 60. Arpke RW, Shams AS, Collins BC, et al. Preservation of satellite cell number and  
880 regenerative potential with age reveals locomotory muscle bias. *Skelet Muscle*.  
881 2021;11(22):1-12.
- 882 61. Eliazer S, Muncie JM, Christensen J, Urso RSD, Weaver VM, Brack AS. Wnt4 from the  
883 Niche Controls the Mechano- Properties and Quiescent State of Muscle Stem Cells. *Stem*  
884 *Cell*. 2019;25(5):654-665.e4. doi:10.1016/j.stem.2019.08.007



- 885 62. Sampath SC, Sampath SC, Ho AT V, et al. Induction of muscle stem cell quiescence by  
886 the secreted niche factor Oncostatin M. *Nat Commun.* 2018;9:1-9. doi:10.1038/s41467-  
887 018-03876-8
- 888 63. Southard S, Kim J, Low S, Tsika RW, Lepper C. Myofiber-specific TEAD1  
889 overexpression drives satellite cell hyperplasia and counters pathological effects of  
890 dystrophin deficiency. *Elife.* 2016;5(e15461):1-28. doi:10.7554/eLife.15461
- 891 64. Zofkie W, Southard SM, Braun T, Lepper C. Fibroblast growth factor 6 regulates sizing of  
892 the muscle stem cell pool. *Stem Cell Reports.* 2021;16:1-15.  
893 doi:10.1016/j.stemcr.2021.10.006
- 894 65. Schmalbruch H. Satellite Cells of Rat Muscles as Studied by Freeze-Fracturing. *Anat Rec.*  
895 1978;191:371-376.
- 896 66. García-prat L, Sousa-Victor P, Muñoz-Cánoves P. Functional dysregulation of stem cells  
897 during aging : a focus on skeletal muscle stem cells. *FEBS J.* 2013;280(17):4051-4062.  
898 doi:10.1111/febs.12221
- 899 67. Mouly V, Aamiri A, Bigot A, et al. The mitotic clock in skeletal muscle regeneration ,  
900 disease and cell mediated gene therapy. *Acta Physiologica Scand.* 2005;184:3-15. doi:doi:  
901 10.1111/j.1365-201X.2005.01417.x.
- 902 68. Schultz E, Lipton BH. Skeletal Muscle Satellite Cells: Changes in Proliferation Potential  
903 as a Function of Age. *Mecha.* 1982;20:377-383.
- 904 69. Shefer G, Van De Mark DP, Richardson JB, Yablonka-Reuveni Z. Satellite-cell pool size  
905 does matter : Defining the myogenic potency of aging skeletal muscle. *Dev Biol.*  
906 2006;294:50-66. doi:10.1016/j.ydbio.2006.02.022
- 907 70. Carlson ME, Hsu M, Conboy IM. Imbalance between pSmad3 and Notch induces CDK  
908 inhibitors in old muscle stem cells. *Nature.* 2008;454(7203):528-532.  
909 doi:10.1038/nature07034
- 910 71. Conboy IM, Conboy MJ, Wagers AJ, Girma ER, Weissman IL, Rando TA. Rejuvenation  
911 of aged progenitor cells by exposure to a young systemic environment. *Nature.*  
912 2005;433(February).
- 913 72. Lazure F, Farouni R, Sahinyan K, et al. Transcriptional Reprogramming of Skeletal  
914 Muscle Stem Cells by the Niche Environment Key Words. *bioRxiv.* 2021.
- 915 73. Madden L, Juhas M, Kraus WE, Truskey GA. Bioengineered human myobundles mimic

- 916 clinical responses of skeletal muscle to drugs. 2015:1-14. doi:10.7554/eLife.04885
- 917 74. Bakooshi MA, Lippmann ES, Mulcahy B, et al. A 3D culture model of innervated human  
918 skeletal muscle enables studies of the adult neuromuscular junction. *Elife*.  
919 2019;8(e44530):1-29. doi:10.7554/eLife.44530
- 920 75. Afshar ME, Abraha HY, Bakooshi MA, et al. A 96-well culture platform enables  
921 longitudinal analyses of engineered human skeletal muscle microtissue strength. *Sci Rep*.  
922 2020;10(6918):1-16. doi:10.1038/s41598-020-62837-8
- 923 76. Paisant S, Sambasivan R, Gayraud-morel B, Kelly RG, Tajbakhsh S. Distinct Regulatory  
924 Cascades Govern Extraocular and Pharyngeal Arch Muscle Progenitor Cell Fates. *Dev*  
925 *Cell*. 2009;5:810-821. doi:10.1016/j.devcel.2009.05.008
- 926 77. Higginbotham H, Bielas S, Tanaka T, Gleeson JG. Transgenic mouse line with green-  
927 fluorescent protein-labeled Centrin 2 allows visualization of the centrosome in living cells.  
928 *Transgenic Res*. 2004;13:155-164.
- 929 78. ijs-Perkin Elmer Operetta CLS, Stitching And Export.  
930 [https://c4science.ch/w/bioimaging\\_and\\_optics\\_platform\\_biop/image-](https://c4science.ch/w/bioimaging_and_optics_platform_biop/image-processing/imagej_tools/perkinelmer-stitching/)  
931 [processing/imagej\\_tools/perkinelmer-stitching/](https://c4science.ch/w/bioimaging_and_optics_platform_biop/image-processing/imagej_tools/perkinelmer-stitching/).
- 932 79. Mccoll R, Nkosi M, Snyman C, Niesler C. Analysis and quantification of in vitro  
933 myoblast fusion using LADD Multiple Stain. *Biotechniques*. 2016;61(6):323-326.  
934 doi:10.2144/000114485
- 935 80. Li CH, Lee CK. Minimum cross entropy thresholding. *Pattern Recognit*. 1993;26(4):617-  
936 625. doi:10.1016/0031-3203(93)90115-D
- 937 81. Morton AB, Norton CE, Jacobsen NL, Fernando CA, Cornelison DDW, Segal SS. Barium  
938 chloride injures myofibers through calcium-induced proteolysis with fragmentation of  
939 motor nerves and microvessels. *Skelet Muscle*. 2019;9(27).

940  
941  
942  
943  
944  
945  
946

947 **Figure 1**

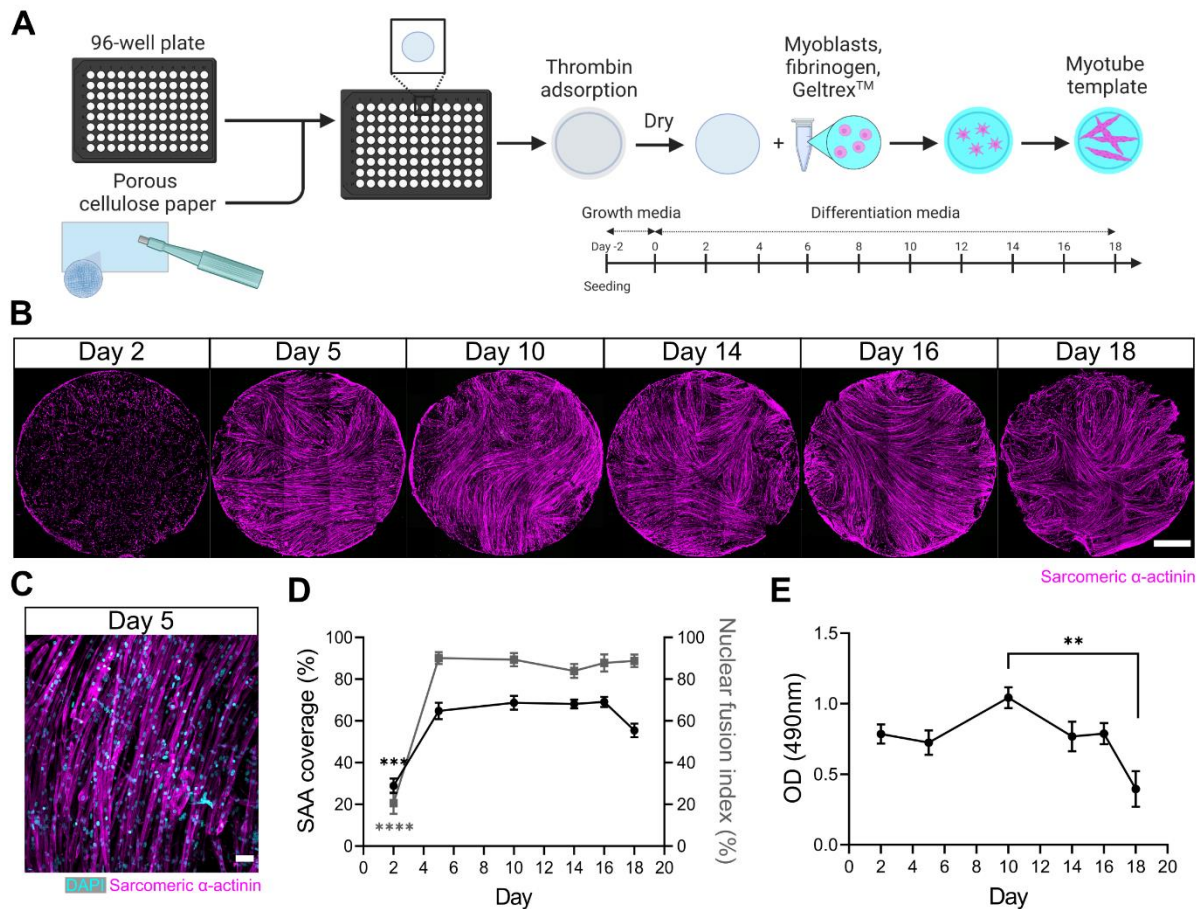

948

949 **Figure 1. A 3D murine skeletal muscle myotube template with a 96-well footprint.** (A) Schematic overview of  
 950 the strategy used to generate myotube templates with an associated timeline for downstream culture (made with  
 951 BioRender). (B) Representative confocal stitched images of myotube templates labelled for sarcomeric  $\alpha$ -actinin  
 952 (SAA) (magenta) at days 2, 5, 10, 14, 16, and 18 of culture. Scale bar, 1 mm. (C) Representative confocal image of  
 953 myotubes at day 5 labelled with DAPI (cyan) and SAA (magenta). Scale bar, 50  $\mu$ m. (D) Quantification of SAA area  
 954 coverage (left-axis) and nuclear fusion index (right-axis) of myotube templates at days 2, 5, 10, 14, 16, and 18 of  
 955 culture. n=9-16 across N=3-6 independent biological replicates. Graph displays mean  $\pm$  s.e.m.; one-way ANOVA with  
 956 Tukey post-test, minimum \*\*\* p=0.002 (SAA coverage) \*\*\*\* p<0.0001 (nuclear fusion index). (E) Optical density  
 957 (OD) at 490 nm of media after myotube template incubation with MTS assay reagent on days 2, 5, 10, 14, 16, and 18  
 958 of culture. n=9-12 across N=3-4 independent biological replicates. Graph displays mean  $\pm$  s.e.m.; one-way ANOVA  
 959 with Tukey post-test, \*\* p=0.0033.

960

961

962

963

964 **Figure 2**

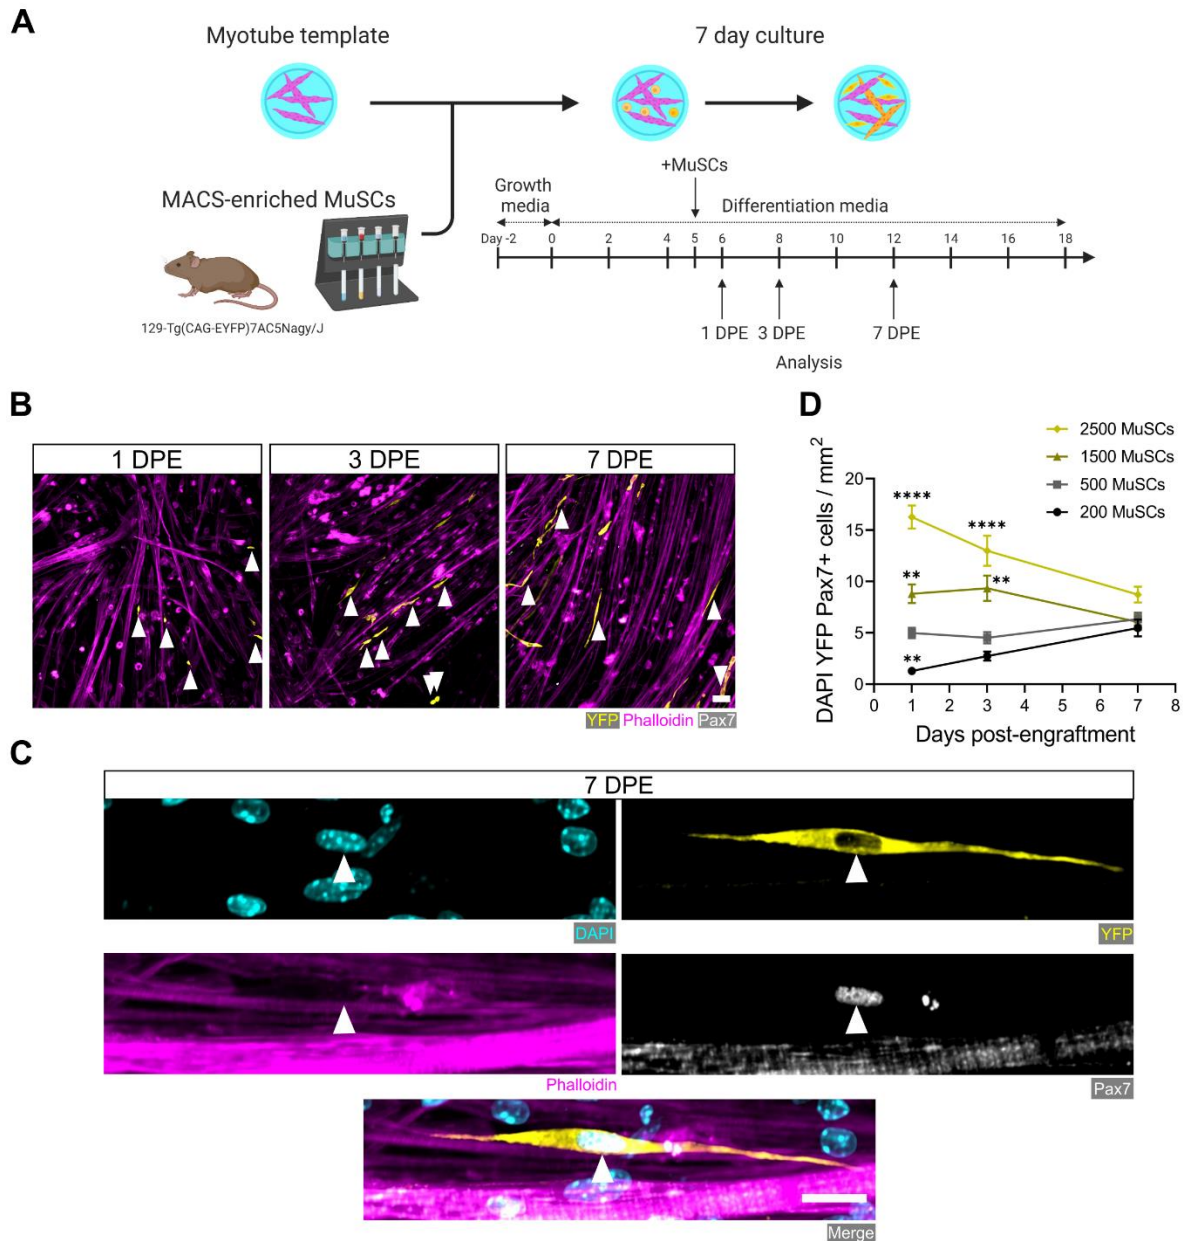

965

966 **Figure 2. Engrafted MuSCs persist in myotube template cultures and achieve a steady-state population density.**

967 (A) Schematic overview of the engraftment of freshly isolated MuSCs and the timeline for downstream analysis (made

968 with BioRender). (B) Representative confocal images of myotube templates (phalloidin: magenta) with engrafted

969 MuSCs (YFP: yellow, Pax7: white, white arrows) at 1, 3 and 7 days post-engraftment (DPE). Scale bar, 50  $\mu$ m. (C)

970 Representative confocal image of a donor MuSC (DAPI: cyan, YFP: yellow, Pax7: white) indicated with a white

971 arrow, and myotubes (phalloidin: magenta) at 7 DPE. Scale bar, 20  $\mu$ m. (D) Quantification of mononuclear

972 DAPI<sup>+</sup>YFP<sup>+</sup>Pax7<sup>+</sup> cell density per mm<sup>2</sup> at 1, 3 and 7 DPE across different starting MuSC engraftment numbers (200,

973 500, 1500, and 2500). n=9-15 across N=3-5 independent biological replicates. Graph displays mean  $\pm$  s.e.m.; one-way

974 ANOVA with Dunnett test for each individual timepoint comparing against the 500 MuSC condition, \*\* p=0.0025,

975 0.0051, 0.0029 \*\*\*\* p<0.0001.

976 **Figure 3**

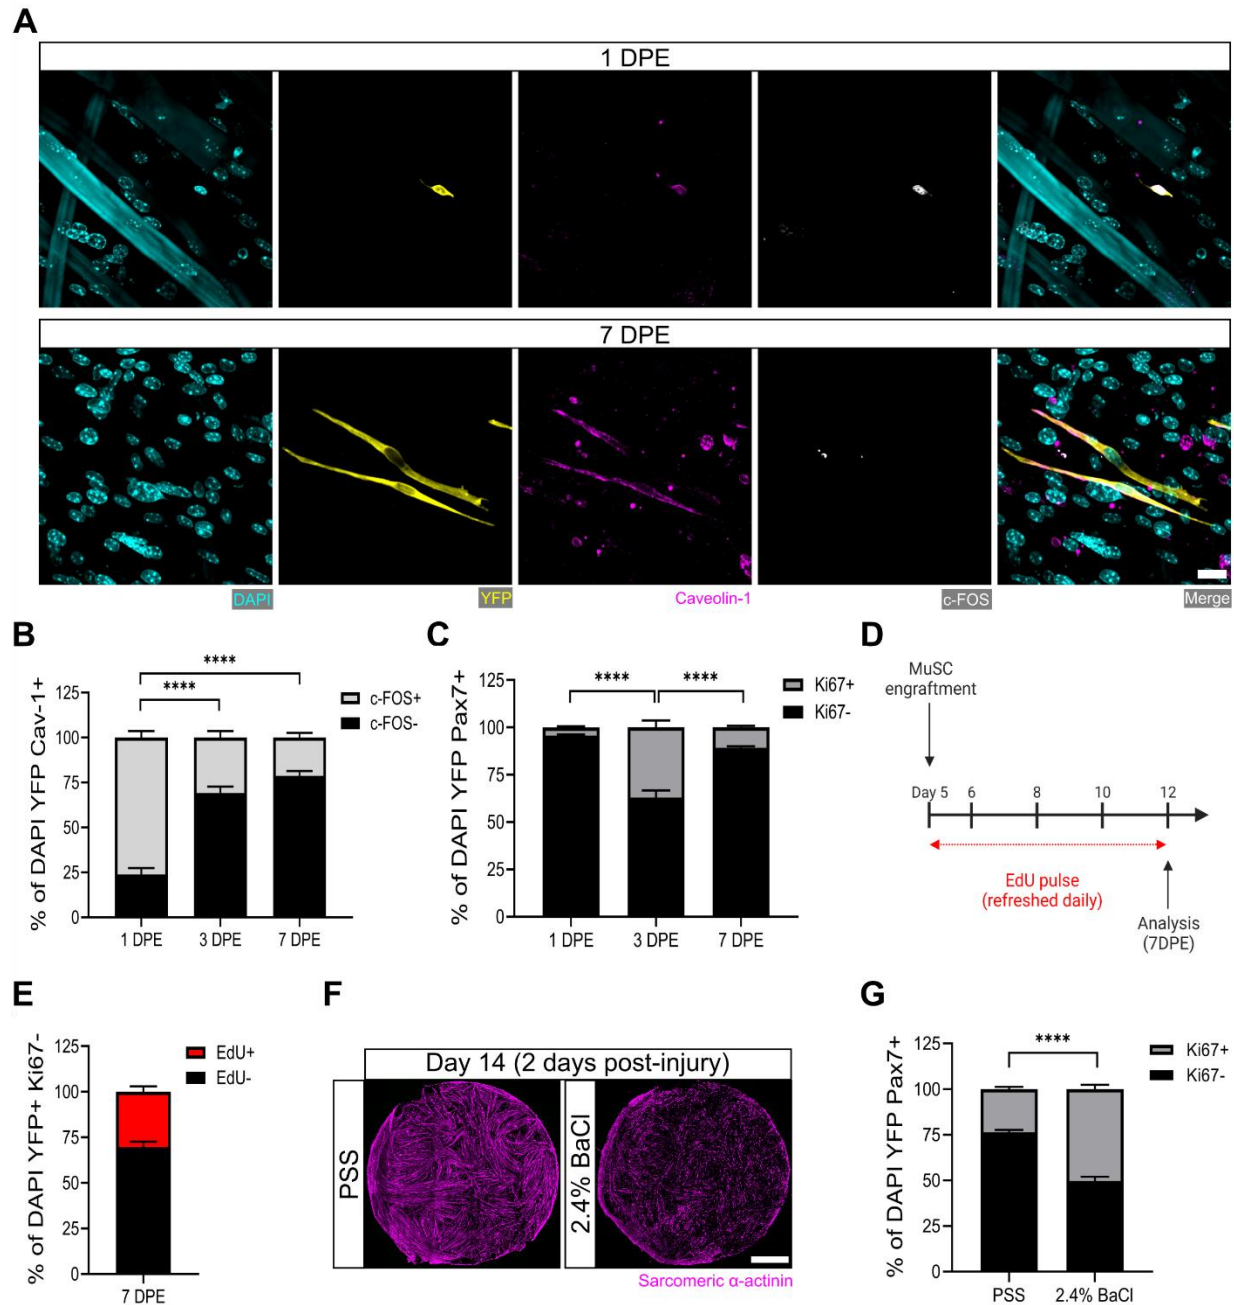

977

978 **Figure 3. MuSCs engrafted within engineered muscle tissue exit cell-cycle and inactivate.** (A) Representative  
 979 confocal image of a mononuclear cell (DAPI: cyan) positive for YFP (yellow), caveolin-1 (magenta) and c-FOS  
 980 (white) at 1 DPE (Top), and a c-FOS<sup>-</sup> cell at 7 DPE (Bottom). Scale bar, 20 μm. (B) Stacked bar graph showing  
 981 proportions of c-FOS<sup>+</sup>/<sup>-</sup> cells at 1, 3 and 7 DPE in the DAPI<sup>+</sup>YFP<sup>+</sup>Cav-1<sup>+</sup> population. n=9 across N=3 independent  
 982 biological replicates. Graph displays mean ± s.e.m. for c-FOS<sup>+</sup> and c-FOS<sup>-</sup>; one-way ANOVA with Tukey post-test  
 983 comparing the FOS<sup>-</sup> proportions of each timepoint, \*\*\*\* p<0.0001. (C) Stacked bar graph showing proportions of  
 984 Ki67<sup>+</sup>/<sup>-</sup> cells at 1, 3 and 7 DPE in the DAPI<sup>+</sup>YFP<sup>+</sup>Pax7<sup>+</sup> population. n=10-11 across N=3-4 independent biological

985 replicates. Graph displays mean  $\pm$  s.e.m. for Ki67<sup>+</sup> and Ki67<sup>-</sup>; one-way ANOVA with Tukey post-test comparing the  
986 Ki67<sup>-</sup> proportions of each timepoint, \*\*\*\* p<0.0001 (D) Timeline of EdU/Ki67 co-labelling experiment (made with  
987 BioRender). (E) Stacked bar graph showing proportions of EdU<sup>+/-</sup> cells at 7 DPE in the DAPI<sup>+</sup>YFP<sup>+</sup>Ki67<sup>-</sup>  
988 mononuclear cell population. n=15 across N=5 independent biological replicates. Graph displays mean  $\pm$  s.e.m. for  
989 EdU<sup>+</sup> and EdU<sup>-</sup>. (F) Representative confocal stitched images of myotube templates (SAA: magenta) 2 days after a 4-  
990 hour exposure to the physiological salt solution (PSS) control or a 2.4 % barium chloride (BaCl<sub>2</sub>) solution. Scale bar,  
991 1 mm. (G) Proportion of Ki67<sup>+/-</sup> cells at 2 DPI in the DAP<sup>+</sup>YFP<sup>+</sup>Pax7<sup>+</sup> population. n=16, 18 across N=5, 6 biological  
992 replicates. Graph displays mean  $\pm$  s.e.m. for Ki67<sup>+</sup> and Ki67<sup>-</sup>; unpaired t-test of the Ki67<sup>-</sup> proportions of both  
993 conditions, \*\*\*\* p<0.0001

994

995

996

997

998

999

1000

1001

1002

1003

1004

1005

1006

1007

1008

1009

1010

1011

1012

1013

1014

1015

1016

1017

1018

1019 **Figure 4**

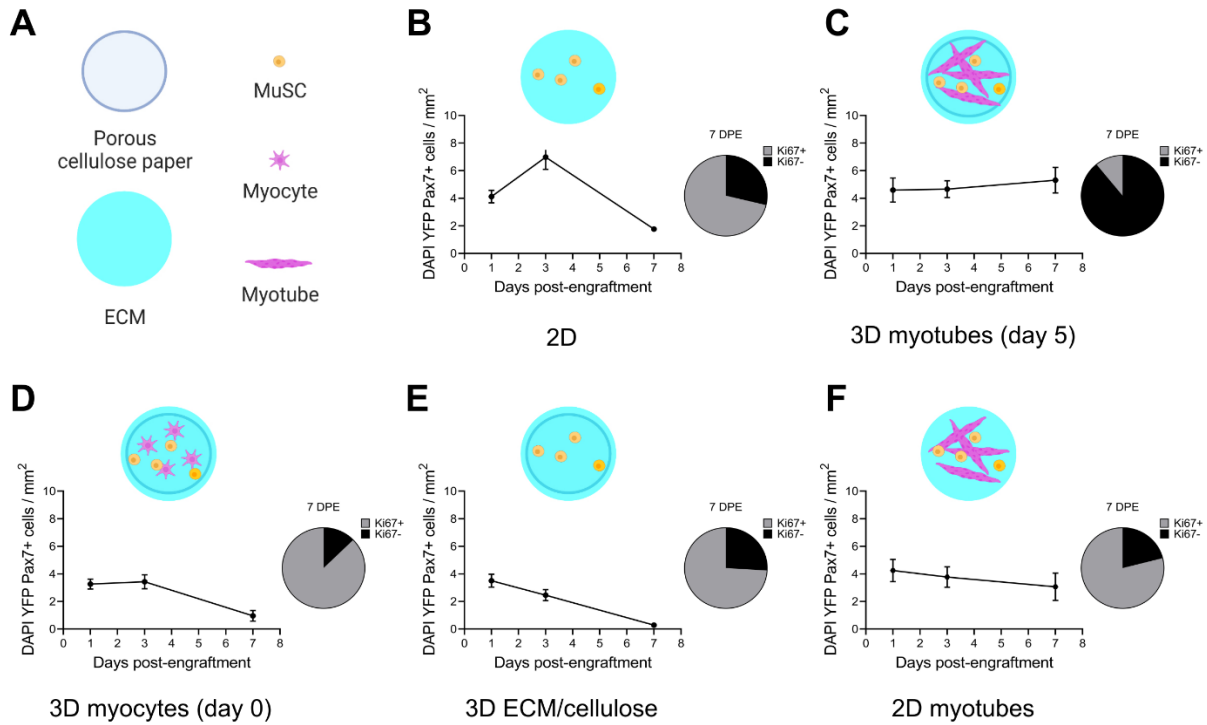

1020

1021 **Figure 4. Permissive culture conditions for a persistent MuSC population *in vitro*.** (A) Key for figure icons. (B-  
 1022 F) Line graphs of mononucleated DAPI<sup>+</sup>YFP<sup>+</sup>Pax7<sup>+</sup> cell density at 1, 3 and 7 DPE (left) and pie charts showing the  
 1023 proportion of Ki67<sup>+/-</sup> cells at 7 DPE (right) for cells seeded into a 2D microwell with a Geltrex<sup>TM</sup> coating (B),  
 1024 engrafted into 3D myotube templates on day 5 (C) vs day 0 (D) of differentiation. Additional comparisons include  
 1025 engraftment into a 3D cellulose reinforced extracellular matrix (ECM) hydrogel on day 5 (E), or onto a 2D monolayer  
 1026 of myotubes with a Geltrex<sup>TM</sup> undercoating on day 5 of differentiation (F). n=6-9 from N=2-3 independent biological  
 1027 replicates. Graphs display mean  $\pm$  s.e.m.

1028

1029

1030

1031

1032

1033

1034

1035

1036

1037

1038

1039 **Figure 5**

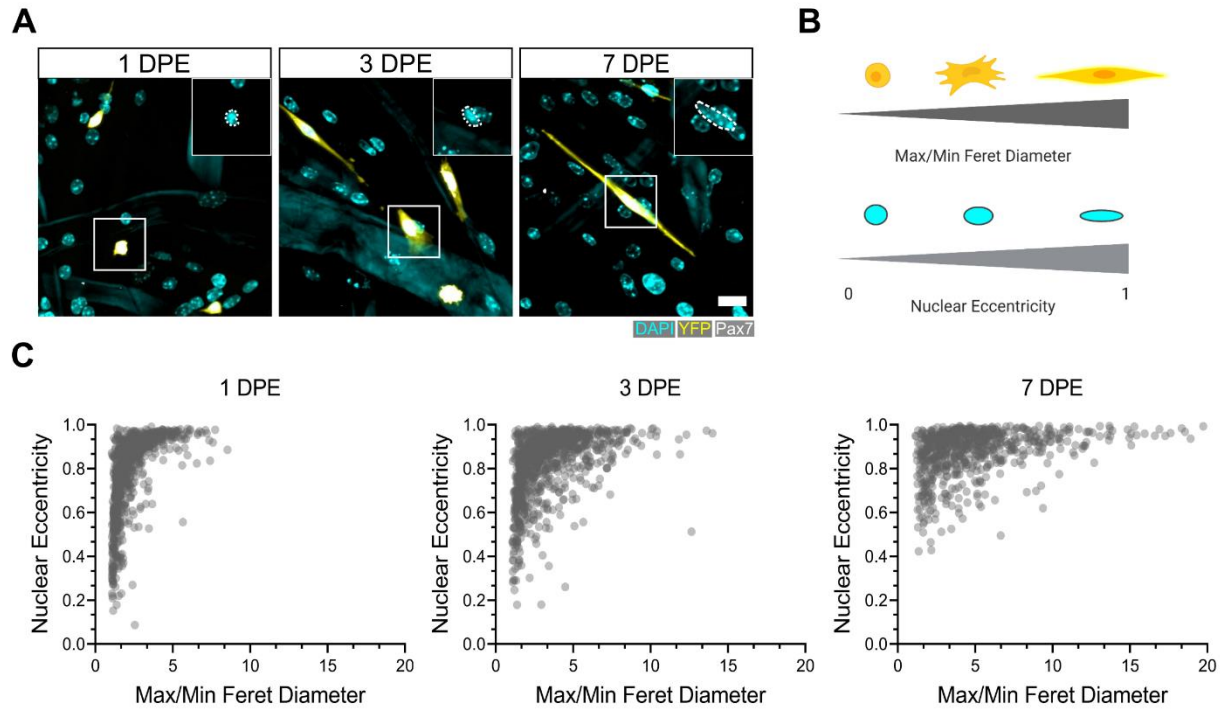

1040

1041 **Figure 5. Morphological evolution of engrafted MuSCs.** (A) Representative confocal images of MuSCs (DAPI:  
1042 cyan, YFP: yellow, Pax7: white) with distinct morphological features at 1, 3 and 7 DPE. Insets highlight nuclear  
1043 morphology with a white dotted outline. Scale bar, 20 μm. (B) Schematic demonstrating the morphological features  
1044 quantified using CellProfiler™ (made with BioRender). (C) Dot plot graphs showing individual Pax7<sup>+</sup> donor cells and  
1045 their associated max/min feret diameter ratio and nuclear eccentricity at 1 (left), 3 (middle), and 7 DPE (right). n=916,  
1046 980 and 737 across N=3-4 biological replicates.

1047

1048

1049

1050

1051

1052

1053

1054

1055

1056

1057

1058



1059 **Figure 6**

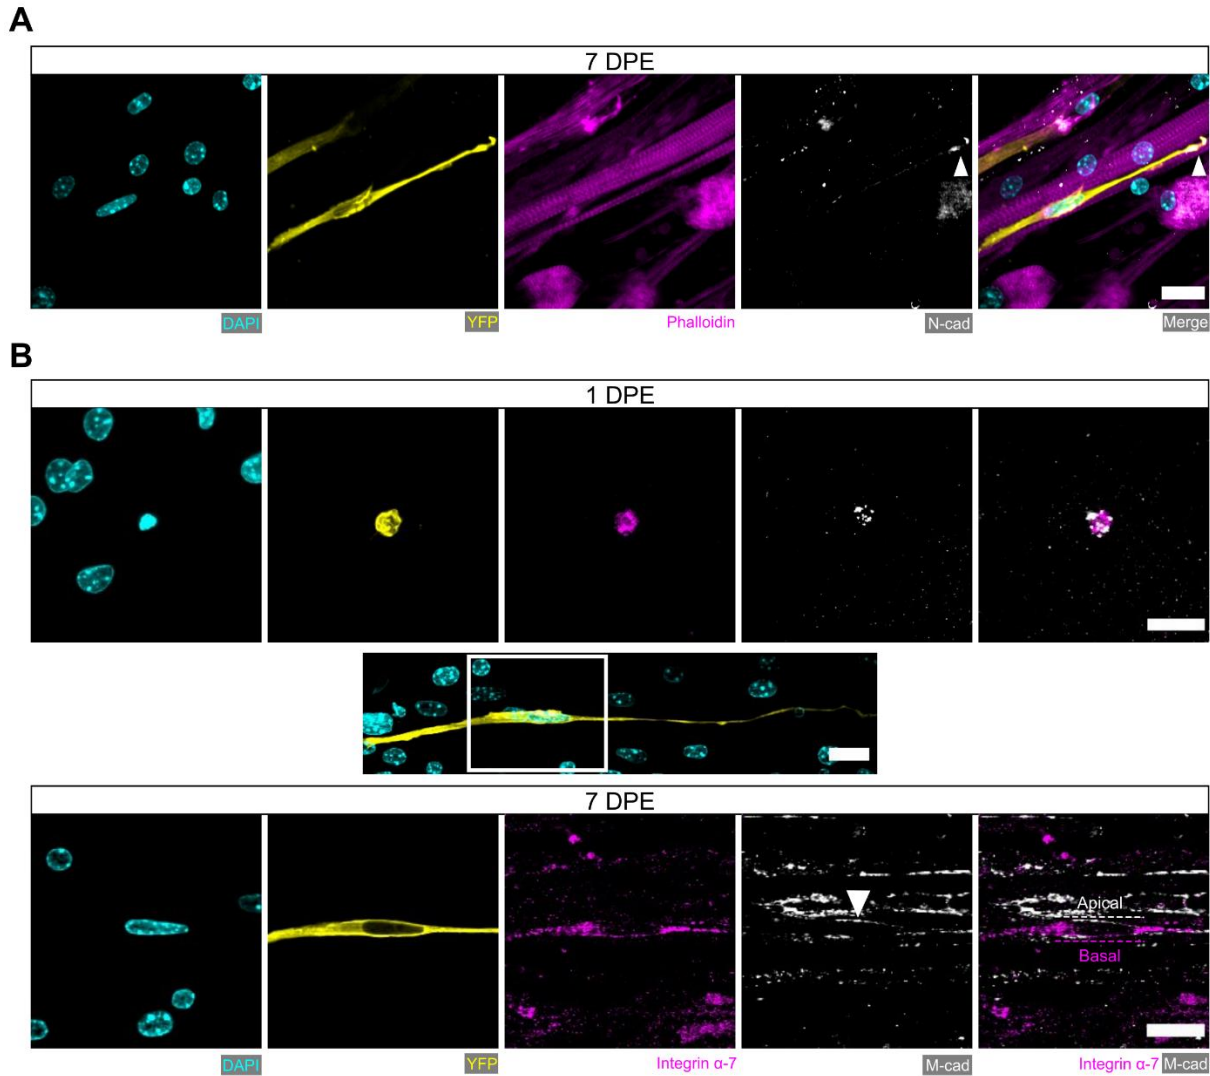

1060

1061 **Figure 6. Engrafted MuSCs display quiescence and niche-related hallmarks.** (A) Representative confocal image  
1062 of a mononuclear donor cell (DAPI: cyan, YFP: yellow) with neighbouring myotubes (Phalloidin: magenta) and N-  
1063 cadherin (white) localized to the tip of the donor cell projection (white arrowhead). Scale bar, 20  $\mu$ m. (B)  
1064 Representative confocal images of a mononuclear donor cell (DAPI: cyan, YFP: yellow) at 1 DPE (top) and 7 DPI  
1065 (middle and bottom) expressing integrin  $\alpha$ -7 (magenta) and M-cadherin (white). Middle inset image channels are  
1066 separated to produce the bottom images to highlight the polarization of integrin  $\alpha$ -7 and M-cadherin (white arrow) to  
1067 basal and apical orientations, respectively (dotted lines). Scale bars, 20  $\mu$ m.

1068

1069

1070

1071

1072

1073

1074

1075 **Figure 7**

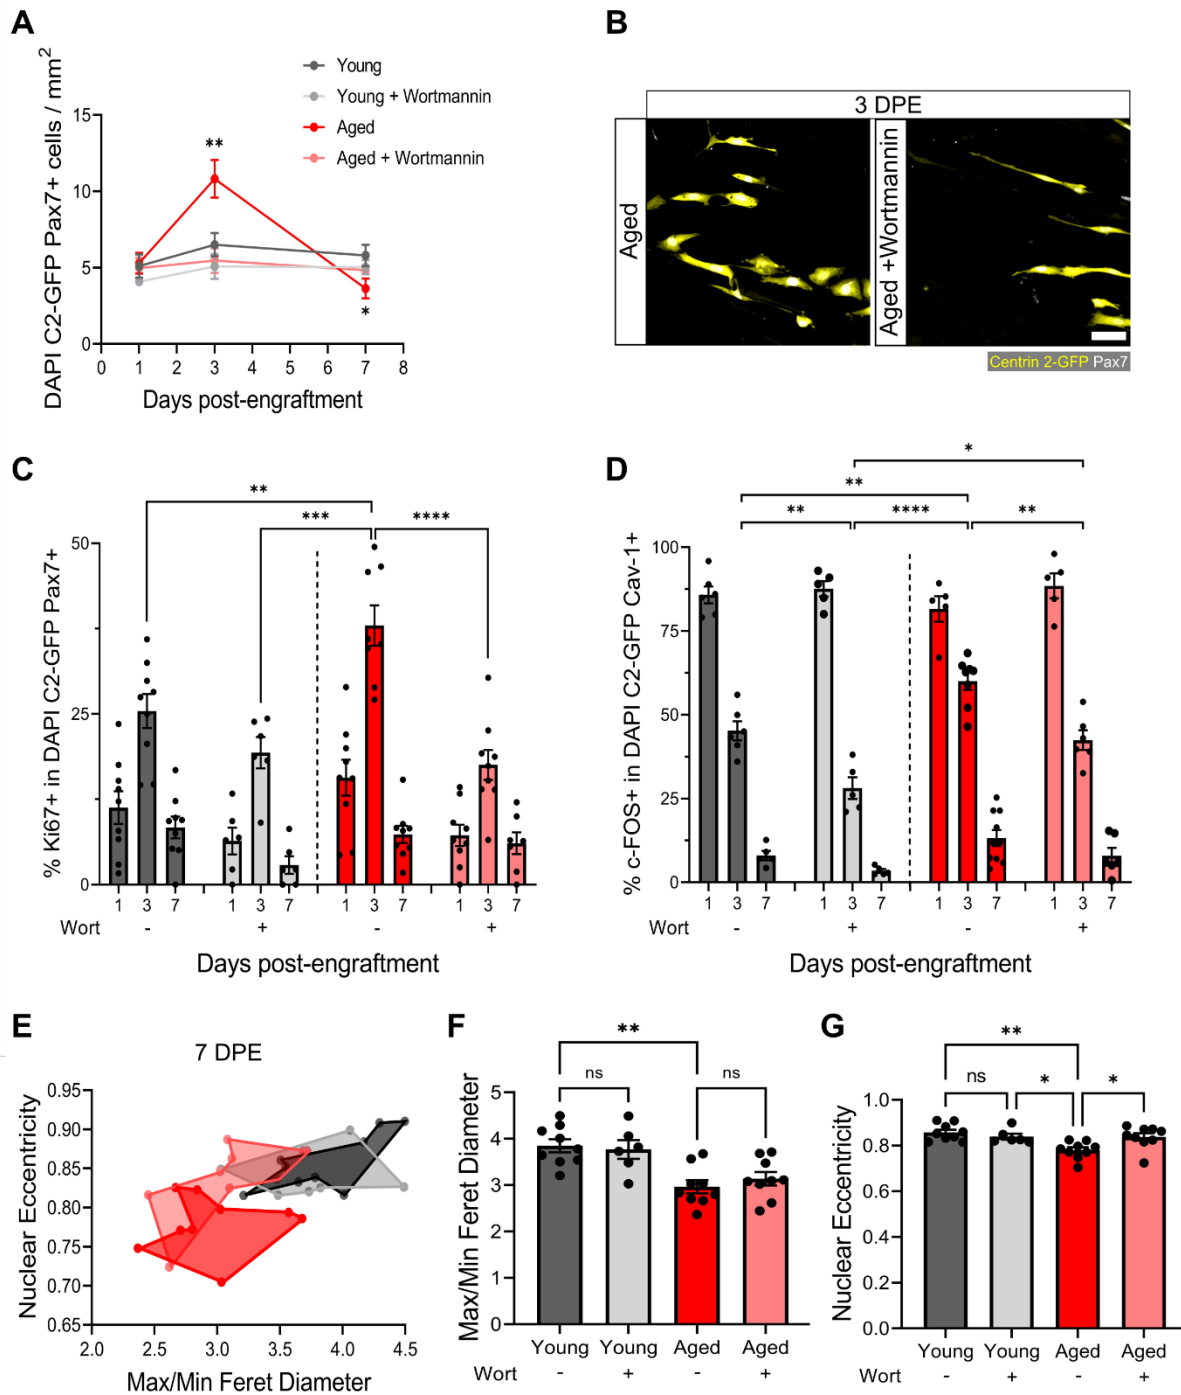

1076

1077 **Figure 7. Aberrant pool size maintenance and inactivation in aged MuSCs is rescued by wortmannin. (A)**  
 1078 Quantification of mononuclear DAPI<sup>+</sup>Centrin 2-GFP (C2-GFP)<sup>+</sup>Pax7<sup>+</sup> cell density per mm<sup>2</sup> at 1, 3 and 7 DPE between  
 1079 engrafted young and aged MuSCs +/- wortmannin (wort) treatment. n=6-9 across N=2-3 independent biological  
 1080 replicates, graph displays mean ± s.e.m.; one-way ANOVA with Dunnet test for each individual timepoint comparing  
 1081 against the young condition, \* p=0.0262 \*\* p=0.0065. **(B)** Representative confocal image of donor cells (Centrin 2-  
 1082 GFP:yellow, Pax7:white) from the aged and aged + wortmannin conditions at 3 DPE. Scale bar, 50 μm. **(C)** Bar graph

1083 showing the percentage of Ki67<sup>+</sup> cells in the DAPI<sup>+</sup>C2-GFP<sup>+</sup>Pax7<sup>+</sup> mononucleated population at 1, 3 and 7 DPE across  
1084 experimental conditions (young: dark grey; young + wortmannin: light grey; aged: red; aged + wortmannin: light red).  
1085 n=6-9 across N=2-3 independent biological replicates, graph displays mean  $\pm$  s.e.m. with individual technical  
1086 replicates; one-way ANOVA with Tukey's post-test comparing the conditions against each other at the 3 DPE  
1087 timepoint, \*\* p= 0.0064 \*\*\* p=0.0003 \*\*\*\*\* p<0.0001 (comparisons not shown are ns). **(D)** Bar graph showing the  
1088 percentage of c-FOS<sup>+</sup> cells in the DAPI<sup>+</sup>C2-GFP<sup>+</sup>Cav-1<sup>+</sup> mononucleated population at 1, 3 and 7 DPE across  
1089 experimental conditions (young: dark grey; young + wortmannin: light grey; aged: red; aged + wortmannin: light red).  
1090 n=5-10 across N=2-3 independent biological replicates, graph displays mean  $\pm$  s.e.m. with individual technical  
1091 replicates; one-way ANOVA with Tukey's post-test comparing the conditions against each other at the 3 DPE  
1092 timepoint, \* p=0.0169 \*\* p= 0.0040, 0.0053, 0.0010 \*\*\*\*\* p<0.0001 (comparisons not shown are ns). **(E)** Dot graph  
1093 where each dot represents the average max/min feret diameter ratio and nuclear eccentricity of the Pax7<sup>+</sup> donor cells  
1094 within the technical replicate (tissue) at the 7 DPE timepoint, color coded according to experimental condition (young:  
1095 dark grey; young + wortmannin: light grey; aged: red; aged + wortmannin: light red). **(F)** Bar graph showing the  
1096 average max/min feret diameter ratio across experimental conditions, graph displays mean  $\pm$  s.e.m. with the individual  
1097 technical replicates from panel E; one-way ANOVA with Tukey's post-test, \*\* p=0.0010 (young vs aged +  
1098 wortmannin and young + wortmannin vs aged are also \*\* p=0.0093, 0.0084, but not shown. All other comparisons  
1099 are not significant. **(G)** Bar graph showing the average nuclear eccentricity across experimental conditions, graph  
1100 displays mean  $\pm$  s.e.m. with the individual technical replicates from panel (E); one-way ANOVA with Tukey's post-  
1101 test, \* p=0.0402, 0.0216 \*\* p=0.0015. All other comparisons are not significant.
